# Supplementary material for: Genomic studies of nitrogen-fixing rhizobial strains from Phaseolus vulgaris seeds and nodules
Source: PubMed Central journal article supplement (PMC5011921; doi:10.1186/s12864-016-3053-z), 2016-09-06
Supplement: 12864_2016_3053_MOESM1_ESM.pdf [file 12864_2016_3053_MOESM1_ESM.pdf]

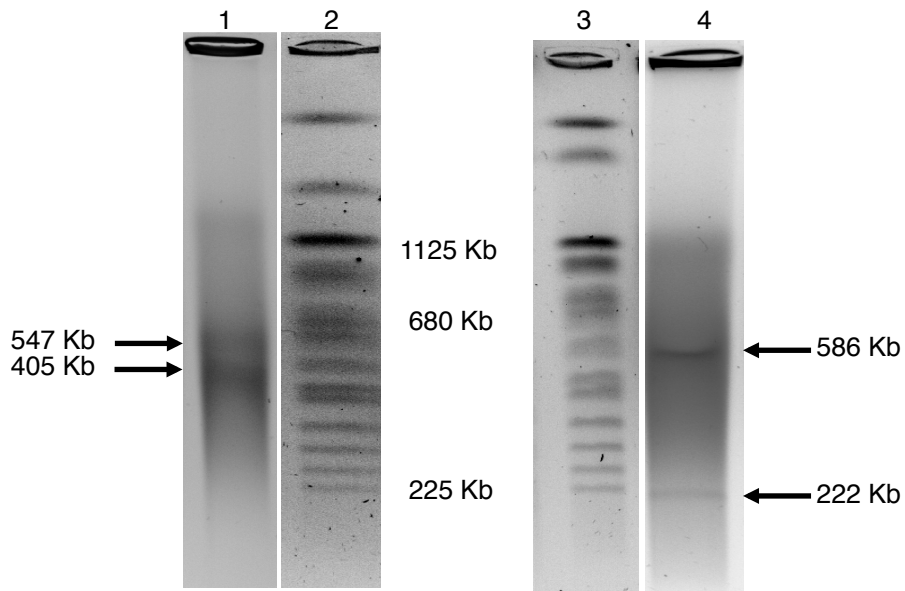

**Supplementary Fig. 1.** Plasmids of *S. americanum* strains visualized by pulsed field gel electrophoresis (PFGE). 1, CCGM7, 2 and 3, molecular weight marker (chromosomes of *Saccharomyces cerevisiae*, only some are denoted). 4, CFNE173. Only the smallest plasmids were visible.
