# Supplementary material for: Genomic studies of nitrogen-fixing rhizobial strains from Phaseolus vulgaris seeds and nodules
Source: PubMed Central journal article supplement (PMC5011921; doi:10.1186/s12864-016-3053-z), 2016-09-06
Supplement: 12864_2016_3053_MOESM2_ESM.pdf [file 12864_2016_3053_MOESM2_ESM.pdf]

**Supplementary Table 1. Strain-specific genes of strains isolated from bean seeds, deduced by pairwise comparison with close relatives. Short genes (<300 nt) were discarded.**

***Rhizobium phaseoli* CCGM1**

| ID             | Name        | COG | Function                                          |
|----------------|-------------|-----|---------------------------------------------------|
| RLPCCGM1_c0006 | -           | L   | hypothetical protein                              |
| RLPCCGM1_c0032 | -           | -   | hypothetical protein                              |
| RLPCCGM1_c0035 | -           | -   | terminase small subunit protein                   |
| RLPCCGM1_c0036 | -           | -   | terminase large subunit protein                   |
| RLPCCGM1_c0037 | -           | -   | hypothetical protein                              |
| RLPCCGM1_c0038 | -           | -   | hypothetical protein                              |
| RLPCCGM1_c0039 | -           | -   | hypothetical protein                              |
| RLPCCGM1_c0040 | -           | -   | major virion structural protein                   |
| RLPCCGM1_c0041 | -           | -   | hypothetical protein                              |
| RLPCCGM1_c0042 | -           | -   | hypothetical protein                              |
| RLPCCGM1_c0043 | -           | -   | hypothetical protein                              |
| RLPCCGM1_c0044 | -           | -   | hypothetical protein                              |
| RLPCCGM1_c0045 | -           | -   | hypothetical protein                              |
| RLPCCGM1_c0046 | -           | -   | hypothetical protein                              |
| RLPCCGM1_c0047 | -           | -   | cellulosome anchoring protein                     |
| RLPCCGM1_c0048 | -           | -   | hypothetical protein                              |
| RLPCCGM1_c0049 | -           | R   | acetyltransferase                                 |
| RLPCCGM1_c0050 | -           | -   | acyltransferase protein                           |
| RLPCCGM1_c0060 | -           | K   | Lacl family transcriptional regulator             |
| RLPCCGM1_c0065 | -           | -   | hypothetical protein                              |
| RLPCCGM1_c0071 | -           | P   | chloride channel protein                          |
| RLPCCGM1_c0072 | -           | E   | hypothetical protein                              |
| RLPCCGM1_c0121 | -           | K   | hypothetical protein                              |
| RLPCCGM1_c0122 | -           | S   | hypothetical protein                              |
| RLPCCGM1_c0132 | -           | -   | LysR family transcriptional regulator             |
| RLPCCGM1_c0146 | -           | -   | hypothetical protein                              |
| RLPCCGM1_c0161 | -           | -   | hypothetical protein                              |
| RLPCCGM1_c0204 | -           | S   | hypothetical protein                              |
| RLPCCGM1_c0205 | -           | S   | hypothetical protein                              |
| RLPCCGM1_c0212 | -           | I   | short-chain dehydrogenase                         |
| RLPCCGM1_c0242 | -           | E   | membrane alanine aminopeptidase N                 |
| RLPCCGM1_c0244 | -           | -   | hypothetical protein                              |
| RLPCCGM1_c0286 | -           | K   | transcriptional regulator protein                 |
| RLPCCGM1_c0296 | -           | -   | porin                                             |
| RLPCCGM1_c0321 | -           | R   | hypothetical protein                              |
| RLPCCGM1_c0397 | -           | H   | monooxygenase                                     |
| RLPCCGM1_c0398 | -           | -   | PadR transcriptional regulator                    |
| RLPCCGM1_c0403 | -           | L   | regulatory inactivation of DnaA Hda protein       |
| RLPCCGM1_c0407 | -           | L   | adenylate cyclase                                 |
| RLPCCGM1_c0426 | <i>ribD</i> | H   | 5-amino-6-(5-phosphoribosylamino)uracil reductase |
| RLPCCGM1_c0434 | -           | -   | hypothetical protein                              |
| RLPCCGM1_c0435 | -           | -   | hypothetical protein                              |
| RLPCCGM1_c0436 | -           | -   | hypothetical protein                              |
| RLPCCGM1_c0437 | -           | -   | acetyltransferase                                 |
| RLPCCGM1_c0438 | -           | Q   | 3-demethylubiquinone-9 3-methyltransferase        |
| RLPCCGM1_c0458 | -           | M   | cellulose synthase catalytic subunit              |
| RLPCCGM1_c0459 | <i>celA</i> | M   | cellulose synthase                                |
| RLPCCGM1_c0679 | -           | -   | periplasmic protein-like protein                  |
| RLPCCGM1_c0681 | -           | E   | ornithine cyclodeaminase                          |

|                |             |   |                                                    |
|----------------|-------------|---|----------------------------------------------------|
| RLPCCGM1_c0682 | -           | M | mandelate racemase/muconate lactonizing enzyme     |
| RLPCCGM1_c0684 | -           | L | DNA helicase                                       |
| RLPCCGM1_c0685 | -           | L | DNA helicase                                       |
| RLPCCGM1_c0765 | -           | - | hypothetical protein                               |
| RLPCCGM1_c0781 | -           | L | transposase                                        |
| RLPCCGM1_c0833 | -           | - | hypothetical protein                               |
| RLPCCGM1_c0834 | -           | - | hypothetical protein                               |
| RLPCCGM1_c0836 | -           | - | hypothetical protein                               |
| RLPCCGM1_c0837 | -           | - | hypothetical protein                               |
| RLPCCGM1_c0840 | -           | - | phage protein                                      |
| RLPCCGM1_c0841 | -           | - | terminase large subunit protein                    |
| RLPCCGM1_c0842 | -           | - | methyl-accepting chemotaxis protein                |
| RLPCCGM1_c0843 | -           | - | hypothetical protein                               |
| RLPCCGM1_c0844 | -           | - | hypothetical protein                               |
| RLPCCGM1_c0845 | -           | - | major virion structural protein                    |
| RLPCCGM1_c0846 | -           | - | hypothetical protein                               |
| RLPCCGM1_c0847 | -           | - | phage protein                                      |
| RLPCCGM1_c0848 | -           | - | hypothetical protein                               |
| RLPCCGM1_c0849 | -           | - | hypothetical protein                               |
| RLPCCGM1_c0850 | -           | - | hypothetical protein                               |
| RLPCCGM1_c0851 | -           | - | hypothetical protein                               |
| RLPCCGM1_c0852 | -           | - | flagellar protein FlgJ                             |
| RLPCCGM1_c0853 | -           | - | hypothetical protein                               |
| RLPCCGM1_c0854 | -           | - | hypothetical protein                               |
| RLPCCGM1_c0857 | -           | - | hypothetical protein                               |
| RLPCCGM1_c0858 | -           | - | phage antirepressor protein                        |
| RLPCCGM1_c0863 | -           | - | hypothetical protein                               |
| RLPCCGM1_c0865 | -           | - | succinoglycan biosynthesis protein exoI            |
| RLPCCGM1_c0869 | -           | L | phage integrase family protein                     |
| RLPCCGM1_c0927 | -           | F | DNA topology modulation kinase FlaR-like protein   |
| RLPCCGM1_c0939 | -           | E | polar amino acid transport system permease protein |
| RLPCCGM1_c0940 | -           | E | polar amino acid transport system permease protein |
| RLPCCGM1_c0958 | -           | H | 2-octaprenyl-6-methoxyphenol hydroxylase           |
| RLPCCGM1_c0959 | -           | H | 2-octaprenyl-6-methoxyphenol hydroxylase           |
| RLPCCGM1_c0964 | -           | - | hypothetical protein                               |
| RLPCCGM1_c0978 | -           | R | hypothetical protein                               |
| RLPCCGM1_c0980 | -           | R | hypothetical protein                               |
| RLPCCGM1_c1074 | -           | G | hypothetical protein                               |
| RLPCCGM1_c1131 | -           | C | hypothetical protein                               |
| RLPCCGM1_c1132 | -           | C | citrate synthase                                   |
| RLPCCGM1_c1147 | -           | R | hypothetical protein                               |
| RLPCCGM1_c1165 | -           | L | transposase                                        |
| RLPCCGM1_c1189 | -           | S | hypothetical protein                               |
| RLPCCGM1_c1191 | -           | - | hypothetical protein                               |
| RLPCCGM1_c1198 | -           | T | two-component sensor histidine kinase              |
| RLPCCGM1_c1206 | -           | T | two-component response regulator protein           |
| RLPCCGM1_c1208 | <i>cheB</i> | N | chemotaxis protein-glutamate methyltransferase     |
| RLPCCGM1_c1209 | <i>cheR</i> | N | chemotaxis methyltransferase                       |
| RLPCCGM1_c1219 | -           | - | hypothetical protein                               |
| RLPCCGM1_c1236 | -           | - | hypothetical protein                               |
| RLPCCGM1_c1238 | -           | - | hypothetical protein                               |
| RLPCCGM1_c1242 | -           | - | micrococcal nuclease (thermonuclease)              |
| RLPCCGM1_c1244 | -           | - | hypothetical protein                               |
| RLPCCGM1_c1246 | -           | S | hypothetical protein                               |

|                |             |   |                                                                                |
|----------------|-------------|---|--------------------------------------------------------------------------------|
| RLPCCGM1_c1247 | -           | - | hypothetical protein                                                           |
| RLPCCGM1_c1248 | -           | - | hypothetical protein                                                           |
| RLPCCGM1_c1249 | -           | - | hypothetical protein                                                           |
| RLPCCGM1_c1250 | -           | R | phage endolysin                                                                |
| RLPCCGM1_c1251 | -           | - | hypothetical protein                                                           |
| RLPCCGM1_c1252 | -           | - | hypothetical protein                                                           |
| RLPCCGM1_c1253 | -           | - | hypothetical protein                                                           |
| RLPCCGM1_c1254 | -           | - | hypothetical protein                                                           |
| RLPCCGM1_c1255 | -           | - | hypothetical protein                                                           |
| RLPCCGM1_c1257 | -           | - | hypothetical protein                                                           |
| RLPCCGM1_c1258 | -           | - | hypothetical protein                                                           |
| RLPCCGM1_c1259 | -           | - | hypothetical protein                                                           |
| RLPCCGM1_c1260 | -           | - | hypothetical protein                                                           |
| RLPCCGM1_c1262 | -           | - | hypothetical protein                                                           |
| RLPCCGM1_c1263 | -           | - | hypothetical protein                                                           |
| RLPCCGM1_c1264 | -           | - | hypothetical protein                                                           |
| RLPCCGM1_c1265 | -           | - | hypothetical protein                                                           |
| RLPCCGM1_c1266 | -           | - | hypothetical protein                                                           |
| RLPCCGM1_c1268 | -           | - | SAM-dependent methyltransferase                                                |
| RLPCCGM1_c1269 | -           | - | hypothetical protein                                                           |
| RLPCCGM1_c1270 | -           | - | hypothetical protein                                                           |
| RLPCCGM1_c1271 | -           | - | hypothetical protein                                                           |
| RLPCCGM1_c1272 | -           | - | phage protein                                                                  |
| RLPCCGM1_c1273 | -           | - | phage protein                                                                  |
| RLPCCGM1_c1274 | -           | - | hypothetical protein                                                           |
| RLPCCGM1_c1275 | -           | O | peptidase S49                                                                  |
| RLPCCGM1_c1276 | -           | R | phage portal protein, lambda family                                            |
| RLPCCGM1_c1278 | -           | - | hypothetical protein                                                           |
| RLPCCGM1_c1279 | -           | R | bacteriophage tail assembly protein                                            |
| RLPCCGM1_c1280 | -           | - | hypothetical protein                                                           |
| RLPCCGM1_c1281 | -           | K | hypothetical protein                                                           |
| RLPCCGM1_c1282 | -           | - | hypothetical protein                                                           |
| RLPCCGM1_c1283 | -           | - | hypothetical protein                                                           |
| RLPCCGM1_c1289 | -           | - | hypothetical protein                                                           |
| RLPCCGM1_c1290 | -           | - | hypothetical protein                                                           |
| RLPCCGM1_c1292 | -           | - | hypothetical protein                                                           |
| RLPCCGM1_c1294 | -           | - | hypothetical protein                                                           |
| RLPCCGM1_c1296 | -           | K | phage repressor                                                                |
| RLPCCGM1_c1299 | -           | - | hypothetical protein                                                           |
| RLPCCGM1_c1302 | -           | - | hypothetical protein                                                           |
| RLPCCGM1_c1303 | -           | - | hypothetical protein                                                           |
| RLPCCGM1_c1315 | <i>elaA</i> | R | protein ElaA                                                                   |
| RLPCCGM1_c1316 | -           | S | hypothetical protein                                                           |
| RLPCCGM1_c1388 | -           | S | hypothetical protein                                                           |
| RLPCCGM1_c1389 | -           | S | hypothetical protein                                                           |
| RLPCCGM1_c1402 | -           | S | hypothetical protein                                                           |
| RLPCCGM1_c1417 | -           | - | tRNA synthetase class II (G H P and S)                                         |
| RLPCCGM1_c1419 | -           | T | sensory box/GGDEF family protein                                               |
| RLPCCGM1_c1424 | -           | M | muconate cycloisomerase                                                        |
| RLPCCGM1_c1430 | -           | L | hypothetical protein                                                           |
| RLPCCGM1_c1557 | <i>cobC</i> | E | cobalamin biosynthesis protein, pyridoxal-phosphate-dependent aminotransferase |
| RLPCCGM1_c1576 | -           | - | LysR family transcriptional regulatory protein                                 |
| RLPCCGM1_c1585 | -           | - | hypothetical protein                                                           |

|                |   |   |                                                   |
|----------------|---|---|---------------------------------------------------|
| RLPCCGM1_c1601 | - | G | dihydroxyacetone kinase, ATP-dependent            |
| RLPCCGM1_c1602 | - | S | hypothetical protein                              |
| RLPCCGM1_c1607 | - | R | methyltransferase                                 |
| RLPCCGM1_c1608 | - | P | iron-chelator utilization protein                 |
| RLPCCGM1_c1614 | - | H | oxidoreductase                                    |
| RLPCCGM1_c1615 | - | - | transcriptional regulator, TetR family            |
| RLPCCGM1_c1623 | - | - | hypothetical protein                              |
| RLPCCGM1_c1646 | - | - | hypothetical protein                              |
| RLPCCGM1_c1658 | - | L | transposase                                       |
| RLPCCGM1_c1712 | - | - | hypothetical protein                              |
| RLPCCGM1_c1731 | - | - | hypothetical protein                              |
| RLPCCGM1_c1732 | - | - | hypothetical protein                              |
| RLPCCGM1_c1741 | - | - | hypothetical protein                              |
| RLPCCGM1_c1750 | - | K | GntR family transcriptional regulator             |
| RLPCCGM1_c1797 | - | - | hypothetical protein                              |
| RLPCCGM1_c1809 | - | S | hypothetical protein                              |
| RLPCCGM1_c1821 | - | - | hypothetical protein                              |
| RLPCCGM1_c1823 | - | K | transcriptional regulator, TetR family            |
| RLPCCGM1_c1837 | - | J | hypothetical protein                              |
| RLPCCGM1_c1838 | - | J | hypothetical protein                              |
| RLPCCGM1_c1839 | - | J | tetracycline resistance protein                   |
| RLPCCGM1_c1864 | - | - | hypothetical protein                              |
| RLPCCGM1_c1874 | - | K | GntR family transcriptional regulator             |
| RLPCCGM1_c1922 | - | - | hypothetical protein                              |
| RLPCCGM1_c1991 | - | - | hypothetical protein                              |
| RLPCCGM1_c2011 | - | - | hypothetical protein                              |
| RLPCCGM1_c2012 | - | L | adenine specific DNA methyltransferase, D12 class |
| RLPCCGM1_c2014 | - | - | hypothetical protein                              |
| RLPCCGM1_c2015 | - | - | hypothetical protein                              |
| RLPCCGM1_c2016 | - | S | tail protein                                      |
| RLPCCGM1_c2017 | - | S | phage FluMu protein gp47                          |
| RLPCCGM1_c2018 | - | - | hypothetical protein                              |
| RLPCCGM1_c2019 | - | - | Mu-like prophage protein gp45-like protein        |
| RLPCCGM1_c2020 | - | R | Mu P family protein                               |
| RLPCCGM1_c2021 | - | - | Mu-like prophage DNA circulation protein          |
| RLPCCGM1_c2022 | - | - | hypothetical protein                              |
| RLPCCGM1_c2024 | - | - | hypothetical protein                              |
| RLPCCGM1_c2025 | - | - | hypothetical protein                              |
| RLPCCGM1_c2026 | - | R | Mu tail sheath family protein                     |
| RLPCCGM1_c2027 | - | - | hypothetical protein                              |
| RLPCCGM1_c2028 | - | - | hypothetical protein                              |
| RLPCCGM1_c2029 | - | S | hypothetical protein                              |
| RLPCCGM1_c2030 | - | - | hypothetical protein                              |
| RLPCCGM1_c2031 | - | - | hypothetical protein                              |
| RLPCCGM1_c2032 | - | R | Mu-like prophage FluMu major head subunit         |
| RLPCCGM1_c2033 | - | - | hypothetical protein                              |
| RLPCCGM1_c2034 | - | R | Mu-like prophage I protein-like protein           |
| RLPCCGM1_c2035 | - | R | phage virion morphogenesis protein                |
| RLPCCGM1_c2036 | - | S | phage (Mu-like) virion morphogenesis protein      |
| RLPCCGM1_c2037 | - | S | Mu-like prophage FluMu protein gp29               |
| RLPCCGM1_c2038 | - | R | Mu-like prophage FluMu protein gp28               |
| RLPCCGM1_c2039 | - | - | Mu-like prophage FluMu protein gp27               |
| RLPCCGM1_c2040 | - | - | phage protein                                     |
| RLPCCGM1_c2041 | - | - | hypothetical protein                              |

|                |             |   |                                                               |
|----------------|-------------|---|---------------------------------------------------------------|
| RLPCCGM1_c2042 | -           | - | hypothetical protein                                          |
| RLPCCGM1_c2044 | -           | - | hypothetical protein                                          |
| RLPCCGM1_c2045 | -           | - | hypothetical protein                                          |
| RLPCCGM1_c2046 | -           | S | protein gp16                                                  |
| RLPCCGM1_c2047 | -           | - | hypothetical protein                                          |
| RLPCCGM1_c2049 | -           | - | hypothetical protein                                          |
| RLPCCGM1_c2053 | -           | R | bacteriophage DNA transposition protein B                     |
| RLPCCGM1_c2054 | -           | L | transposase                                                   |
| RLPCCGM1_c2055 | -           | - | hypothetical protein                                          |
| RLPCCGM1_c2056 | <i>parB</i> | K | chromosome partitioning protein parB                          |
| RLPCCGM1_c2057 | -           | - | hypothetical protein                                          |
| RLPCCGM1_c2058 | -           | - | hypothetical protein                                          |
| RLPCCGM1_c2060 | -           | - | hypothetical protein                                          |
| RLPCCGM1_c2061 | -           | - | hypothetical protein                                          |
| RLPCCGM1_c2062 | -           | - | hypothetical protein                                          |
| RLPCCGM1_c2090 | -           | - | hypothetical protein                                          |
| RLPCCGM1_c2198 | -           | S | extensin-like protein                                         |
| RLPCCGM1_c2300 | -           | P | potassium channel protein                                     |
| RLPCCGM1_c2329 | -           | - | transmembrane protein                                         |
| RLPCCGM1_c2332 | <i>pssR</i> | R | acetyltransferase                                             |
| RLPCCGM1_c2333 | <i>pssM</i> | - | ketal pyruvate transferase                                    |
| RLPCCGM1_c2335 | <i>pssK</i> | G | exopolysaccharide polymerization protein                      |
| RLPCCGM1_c2336 | <i>pssJ</i> | - | galactosyltransferase                                         |
| RLPCCGM1_c2363 | -           | M | mannose-1-phosphate guanylyltransferase                       |
| RLPCCGM1_c2364 | <i>noeJ</i> | G | mannose-1-phosphate guanylyltransferase (GDP) protein         |
| RLPCCGM1_c2410 | -           | - | hypothetical protein                                          |
| RLPCCGM1_c2536 | -           | E | spermidine Putrescine ABC transporter permease component potC |
| RLPCCGM1_c2609 | -           | S | hypothetical protein                                          |
| RLPCCGM1_c2657 | -           | K | transcriptional regulator IrhA                                |
| RLPCCGM1_c2751 | -           | K | acetyltransferase                                             |
| RLPCCGM1_c3178 | -           | E | extracellular solute-binding protein                          |
| RLPCCGM1_c3185 | -           | J | amino acid--(acyl-carrier-protein) ligase                     |
| RLPCCGM1_c3186 | -           | - | serine--tRNA ligase protein                                   |
| RLPCCGM1_c3201 | -           | G | transport protein                                             |
| RLPCCGM1_c3278 | <i>mltA</i> | M | membrane-bound lytic murein transglycosylase                  |
| RLPCCGM1_c3335 | -           | L | Superfamily I DNA/RNA helicase protein                        |
| RLPCCGM1_c3336 | -           | L | Superfamily I DNA/RNA helicase protein                        |
| RLPCCGM1_c3373 | -           | - | hypothetical protein                                          |
| RLPCCGM1_c3374 | -           | L | integrase                                                     |
| RLPCCGM1_c3377 | -           | - | integrase family protein                                      |
| RLPCCGM1_c3379 | -           | - | signal-transduction protein with CBS domain protein           |
| RLPCCGM1_c3397 | -           | - | hypothetical protein                                          |
| RLPCCGM1_c3424 | <i>infB</i> | J | translation initiation factor IF-2                            |
| RLPCCGM1_c3462 | <i>ftsK</i> | D | cell division protein                                         |
| RLPCCGM1_c3595 | -           | E | hypothetical protein                                          |
| RLPCCGM1_c3726 | -           | I | fatty acid desaturase                                         |
| RLPCCGM1_c3727 | -           | K | ArsR family transcriptional regulator                         |
| RLPCCGM1_c3739 | -           | - | hypothetical protein                                          |
| RLPCCGM1_c3750 | -           | K | TfoX domain protein                                           |
| RLPCCGM1_c3753 | -           | - | two-component response regulator protein                      |
| RLPCCGM1_c3754 | -           | S | two-component response regulator protein                      |
| RLPCCGM1_c3849 | <i>cspA</i> | K | cold shock protein                                            |
| RLPCCGM1_c3880 | -           | - | hypothetical protein                                          |
| RLPCCGM1_c4039 | -           | - | methyltransferase type 11                                     |

|                |             |   |                                                                             |
|----------------|-------------|---|-----------------------------------------------------------------------------|
| RLPCCGM1_c4052 | -           | M | glycosyl transferase                                                        |
| RLPCCGM1_c4053 | -           | Q | methyltransferase type 11                                                   |
| RLPCCGM1_c4055 | -           | - | hypothetical protein                                                        |
| RLPCCGM1_c4056 | -           | - | sugar transferase                                                           |
| RLPCCGM1_c4057 | -           | M | glycosyl transferase                                                        |
| RLPCCGM1_c4100 | -           | O | hypothetical protein                                                        |
| RLPCCGM1_c4131 | -           | D | scaffold protein for (4Fe-4S) cluster assembly ApbC, MRP-like protein       |
| RLPCCGM1_c4178 | -           | I | acyl-CoA dehydrogenase                                                      |
| RLPCCGM1_c4179 | -           | I | cyl-CoA dehydrogenase protein                                               |
| RLPCCGM1_c4207 | -           | T | diguanylate cyclase/phosphodiesterase with PAS/PAC sensor(s)                |
| RLPCCGM1_c4228 | -           | F | hypothetical protein                                                        |
| RLPCCGM1_c4264 | -           | D | hypothetical protein                                                        |
| RLPCCGM1_c4269 | -           | - | hypothetical protein                                                        |
| RLPCCGM1_c4273 | -           | - | hypothetical protein                                                        |
| RLPCCGM1_c4277 | -           | - | acetyltransferase                                                           |
| RLPCCGM1_c4278 | -           | S | transcriptional regulator                                                   |
| RLPCCGM1_c4288 | -           | - | transmembrane protein                                                       |
| RLPCCGM1_c4303 | -           | Q | hypothetical protein                                                        |
| RLPCCGM1_p0013 | -           | R | phenazine biosynthesis protein PhzF                                         |
| RLPCCGM1_p0014 | -           | P | manganese transport protein                                                 |
| RLPCCGM1_p0020 | <i>cheR</i> | T | chemotaxis protein methyltransferase CheR                                   |
| RLPCCGM1_p0022 | -           | T | hypothetical protein                                                        |
| RLPCCGM1_p0023 | -           | T | sensor histidine kinase                                                     |
| RLPCCGM1_p0026 | -           | - | transcriptional regulator, PadR family                                      |
| RLPCCGM1_p0027 | -           | C | zinc-binding dehydrogenase                                                  |
| RLPCCGM1_p0028 | -           | - | hypothetical protein                                                        |
| RLPCCGM1_p0033 | -           | - | hypothetical protein                                                        |
| RLPCCGM1_p0036 | -           | - | hypothetical protein                                                        |
| RLPCCGM1_p0037 | -           | - | hypothetical protein                                                        |
| RLPCCGM1_p0038 | -           | S | hicB family protein                                                         |
| RLPCCGM1_p0040 | -           | M | potassium efflux system KefA protein                                        |
| RLPCCGM1_p0041 | -           | P | arylsulfatase                                                               |
| RLPCCGM1_p0044 | -           | - | hypothetical protein                                                        |
| RLPCCGM1_p0048 | -           | - | hypothetical protein                                                        |
| RLPCCGM1_p0049 | -           | - | hypothetical protein                                                        |
| RLPCCGM1_p0050 | -           | - | hypothetical protein                                                        |
| RLPCCGM1_p0052 | -           | - | phosphoglycerate kinase                                                     |
| RLPCCGM1_p0054 | -           | - | cysteine rich repeat domain protein                                         |
| RLPCCGM1_p0055 | -           | - | OmpA/MotB domain protein                                                    |
| RLPCCGM1_p0056 | -           | - | hypothetical protein                                                        |
| RLPCCGM1_p0057 | -           | P | hypothetical protein                                                        |
| RLPCCGM1_p0060 | -           | S | hypothetical protein                                                        |
| RLPCCGM1_p0067 | -           | - | hypothetical protein                                                        |
| RLPCCGM1_p0085 | -           | T | adenylate/guanylate cyclase                                                 |
| RLPCCGM1_p0087 | -           | - | hypothetical protein                                                        |
| RLPCCGM1_p0088 | -           | S | hypothetical protein                                                        |
| RLPCCGM1_p0090 | -           | - | hypothetical protein                                                        |
| RLPCCGM1_p0094 | -           | I | hypothetical protein                                                        |
| RLPCCGM1_p0105 | -           | E | prolyl endopeptidase                                                        |
| RLPCCGM1_p0108 | -           | - | transposase                                                                 |
| RLPCCGM1_p0117 | -           | S | gifsy-2 prophage protein                                                    |
| RLPCCGM1_p0119 | -           | S | gifsy-2 prophage protein                                                    |
| RLPCCGM1_p0122 | -           | L | integrase/recombinase clustered with segregation and condensation protein B |

|                |             |   |                                                                             |
|----------------|-------------|---|-----------------------------------------------------------------------------|
| RLPCCGM1_p0123 | -           | L | integrase/recombinase clustered with segregation and condensation protein B |
| RLPCCGM1_p0125 | -           | S | hypothetical protein                                                        |
| RLPCCGM1_p0134 | -           | G | TRAP-type C4-dicarboxylate transport system, periplasmic component          |
| RLPCCGM1_p0135 | -           | - | hypothetical protein                                                        |
| RLPCCGM1_p0145 | -           | R | hydrolase of the alpha/beta superfamily                                     |
| RLPCCGM1_p0151 | -           | E | FAD dependent oxidoreductase                                                |
| RLPCCGM1_p0153 | -           | E | saccharopine dehydrogenase                                                  |
| RLPCCGM1_p0154 | -           | M | hypothetical protein                                                        |
| RLPCCGM1_p0156 | -           | F | hypothetical protein                                                        |
| RLPCCGM1_p0157 | -           | - | hypothetical protein                                                        |
| RLPCCGM1_p0158 | -           | K | TetR family transcriptional regulator                                       |
| RLPCCGM1_p0161 | <i>kce</i>  | S | 3-keto-5-aminohexanoate cleavage enzyme                                     |
| RLPCCGM1_p0162 | -           | - | hypothetical protein                                                        |
| RLPCCGM1_p0167 | -           | S | hypothetical protein                                                        |
| RLPCCGM1_p0168 | -           | - | hypothetical protein                                                        |
| RLPCCGM1_p0181 | -           | - | TetR family transcriptional regulator                                       |
| RLPCCGM1_p0183 | -           | I | oxidoreductase                                                              |
| RLPCCGM1_p0246 | -           | E | ABC transporter, periplasmic substrate-binding protein                      |
| RLPCCGM1_p0247 | -           | E | ABC transporter, periplasmic substrate-binding protein                      |
| RLPCCGM1_p0282 | -           | - | transcriptional regulator protein                                           |
| RLPCCGM1_p0287 | -           | Q | isochorismatase hydrolase                                                   |
| RLPCCGM1_p0302 | -           | G | inner membrane component of tripartite multidrug resistance system          |
| RLPCCGM1_p0318 | -           | R | NADP oxidoreductase coenzyme F420-dependent                                 |
| RLPCCGM1_p0343 | -           | S | hypothetical protein                                                        |
| RLPCCGM1_p0344 | -           | - | hypothetical protein                                                        |
| RLPCCGM1_p0378 | -           | - | hypothetical protein                                                        |
| RLPCCGM1_p0439 | -           | R | hydrolase                                                                   |
| RLPCCGM1_p0443 | <i>hutU</i> | E | urocanate hydratase                                                         |
| RLPCCGM1_p0461 | -           | Q | ubiquinone/menaquinone biosynthesis methyltransferase ubiE                  |
| RLPCCGM1_p0470 | -           | S | hypothetical protein                                                        |
| RLPCCGM1_p0471 | -           | - | hypothetical protein                                                        |
| RLPCCGM1_p0472 | -           | - | hypothetical protein                                                        |
| RLPCCGM1_p0497 | -           | - | hypothetical protein                                                        |
| RLPCCGM1_p0498 | -           | R | ankyrin repeat-rich membrane spanning protein                               |
| RLPCCGM1_p0503 | -           | E | oligopeptide ABC transporter ATP-binding protein                            |
| RLPCCGM1_p0520 | -           | T | multi-sensor hybrid histidine kinase                                        |
| RLPCCGM1_p0526 | <i>copD</i> | P | copper resistance protein D                                                 |
| RLPCCGM1_p0527 | -           | R | hypothetical protein                                                        |
| RLPCCGM1_p0529 | -           | S | hypothetical protein                                                        |
| RLPCCGM1_p0531 | -           | L | hypothetical protein                                                        |
| RLPCCGM1_p0538 | -           | L | hypothetical protein                                                        |
| RLPCCGM1_p0539 | -           | L | transposase                                                                 |
| RLPCCGM1_p0542 | -           | L | transposase                                                                 |
| RLPCCGM1_p0543 | -           | L | insertion sequence IS21 ATP-binding protein                                 |
| RLPCCGM1_p0549 | -           | L | insertion sequence ATP-binding protein                                      |
| RLPCCGM1_p0551 | -           | L | retron-type RNA-directed DNA polymerase                                     |
| RLPCCGM1_p0567 | -           | - | 3-hydroxyalkanoate synthetase                                               |
| RLPCCGM1_p0569 | -           | - | hypothetical protein                                                        |
| RLPCCGM1_p0570 | -           | - | monophenol monooxygenase                                                    |
| RLPCCGM1_p0571 | -           | L | insertion sequence transposase                                              |
| RLPCCGM1_p0573 | -           | - | hypothetical protein                                                        |
| RLPCCGM1_p0574 | -           | - | hypothetical protein                                                        |

|                |             |   |                                                                                |
|----------------|-------------|---|--------------------------------------------------------------------------------|
| RLPCCGM1_p0575 | -           | - | hypothetical protein                                                           |
| RLPCCGM1_p0597 | -           | - | hypothetical protein                                                           |
| RLPCCGM1_p0599 | -           | - | hypothetical protein                                                           |
| RLPCCGM1_p0602 | -           | L | transposase                                                                    |
| RLPCCGM1_p0603 | -           | L | transposase                                                                    |
| RLPCCGM1_p0612 | -           | L | transposase                                                                    |
| RLPCCGM1_p0613 | -           | K | LysR family transcriptional regulator                                          |
| RLPCCGM1_p0618 | -           | Q | L-ascorbate oxidase                                                            |
| RLPCCGM1_p0627 | -           | - | ABC transporter, permease protein                                              |
| RLPCCGM1_p0634 | -           | T | two-component sensor histidine kinase/response regulator hybrid protein (FixL) |
| RLPCCGM1_p0643 | -           | P | cation transport P-type ATPase                                                 |
| RLPCCGM1_p0646 | -           | - | hypothetical protein                                                           |
| RLPCCGM1_p0647 | -           | - | hypothetical protein                                                           |
| RLPCCGM1_p0648 | -           | - | hypothetical protein                                                           |
| RLPCCGM1_p0649 | -           | - | hypothetical protein                                                           |
| RLPCCGM1_p0650 | -           | O | ATPase                                                                         |
| RLPCCGM1_p0665 | <i>nolL</i> | G | nodulation acetyltransferase                                                   |
| RLPCCGM1_p0674 | -           | C | hypothetical protein                                                           |
| RLPCCGM1_p0677 | -           | L | insertion sequence IS21 ATP-binding protein                                    |
| RLPCCGM1_p0678 | -           | L | transposase                                                                    |
| RLPCCGM1_p0685 | <i>retA</i> | L | RNA-directed DNA polymerase RetA                                               |
| RLPCCGM1_p0692 | <i>xykB</i> | C | aryl-alcohol dehydrogenase                                                     |
| RLPCCGM1_p0693 | -           | G | deoxyribose-specific ABC transporter, permease protein                         |
| RLPCCGM1_p0706 | -           | L | hypothetical protein                                                           |
| RLPCCGM1_p0712 | -           | R | metallo-hydrolase                                                              |
| RLPCCGM1_p0718 | -           | - | transposase                                                                    |
| RLPCCGM1_p0759 | <i>nolO</i> | O | nodulation protein NolO                                                        |
| RLPCCGM1_p0768 | -           | L | insertion sequence transposase protein                                         |
| RLPCCGM1_p0769 | -           | L | transposase                                                                    |
| RLPCCGM1_p0775 | <i>cpxP</i> | Q | cytochrome P450 monooxygenase                                                  |
| RLPCCGM1_p0780 | -           | L | hypothetical protein                                                           |
| RLPCCGM1_p0782 | -           | L | hypothetical protein                                                           |
| RLPCCGM1_p0784 | -           | - | hypothetical protein                                                           |
| RLPCCGM1_p0789 | -           | - | hypothetical protein                                                           |
| RLPCCGM1_p0807 | -           | L | transposase                                                                    |
| RLPCCGM1_p0809 | -           | L | transposase                                                                    |
| RLPCCGM1_p0811 | -           | L | insertion sequence transposase protein, IS21/IS408/IS1162 family               |
| RLPCCGM1_p0812 | -           | L | IS21 family insertion sequence ATP-binding protein                             |
| RLPCCGM1_p0818 | -           | - | hypothetical protein                                                           |
| RLPCCGM1_p0849 | <i>ooxA</i> | R | opine oxidase subunit A                                                        |
| RLPCCGM1_p0851 | <i>ooxB</i> | E | opine oxidase subunit B                                                        |
| RLPCCGM1_p0858 | -           | - | 2-haloacid dehalogenase protein                                                |
| RLPCCGM1_p0884 | -           | O | heat shock protein 60 family chaperone GroEL                                   |
| RLPCCGM1_p0889 | -           | R | multimeric flavodoxin WrbA                                                     |
| RLPCCGM1_p0929 | -           | S | hypothetical protein                                                           |
| RLPCCGM1_p0930 | -           | S | hypothetical protein                                                           |
| RLPCCGM1_p0937 | -           | - | hypothetical protein                                                           |
| RLPCCGM1_p1014 | -           | H | gamma-aminobutyratealpha-ketoglutarate aminotransferase                        |
| RLPCCGM1_p1015 | -           | H | gamma-aminobutyratealpha-ketoglutarate aminotransferase                        |
| RLPCCGM1_p1018 | -           | - | hypothetical protein                                                           |
| RLPCCGM1_p1148 | -           | - | hypothetical protein                                                           |
| RLPCCGM1_p1187 | -           | - | hypothetical protein                                                           |
| RLPCCGM1_p1188 | -           | - | hypothetical protein                                                           |



|                |             |   |                                                                      |
|----------------|-------------|---|----------------------------------------------------------------------|
| RLPCCGM1_p1320 | <i>amiF</i> | R | formamidase                                                          |
| RLPCCGM1_p1338 | -           | - | hypothetical protein                                                 |
| RLPCCGM1_p1349 | <i>cheR</i> | N | chemotaxis methyltransferase                                         |
| RLPCCGM1_p1350 | <i>cheB</i> | N | chemotaxis protein-glutamate methylesterase                          |
| RLPCCGM1_p1352 | -           | T | two-component response regulator protein                             |
| RLPCCGM1_p1360 | -           | T | two-component sensor histidine kinase                                |
| RLPCCGM1_p1367 | -           | - | hypothetical protein                                                 |
| RLPCCGM1_p1369 | -           | S | hypothetical protein                                                 |
| RLPCCGM1_p1380 | -           | S | hypothetical protein                                                 |
| RLPCCGM1_p1393 | -           | L | hypothetical protein                                                 |
| RLPCCGM1_p1417 | -           | - | hypothetical protein                                                 |
| RLPCCGM1_p1486 | <i>vbsA</i> | J | N6-hydroxylysine O-acetyltransferase                                 |
| RLPCCGM1_p1514 | -           | R | multi-sensor signal transduction multi-kinase                        |
| RLPCCGM1_p1524 | -           | S | hypothetical protein                                                 |
| RLPCCGM1_p1525 | -           | L | addiction module antitoxin                                           |
| RLPCCGM1_p1526 | -           | M | xylose isomerase                                                     |
| RLPCCGM1_p1527 | -           | G | periplasmic binding protein/LacI transcriptional regulator           |
| RLPCCGM1_p1530 | -           | K | hypothetical protein                                                 |
| RLPCCGM1_p1532 | -           | G | fucose mutarotase                                                    |
| RLPCCGM1_p1535 | -           | Q | cytochrome P450-pinF2, plant-inducible                               |
| RLPCCGM1_p1539 | -           | - | hypothetical protein                                                 |
| RLPCCGM1_p1540 | <i>syrB</i> | - | syrB regulator                                                       |
| RLPCCGM1_p1541 | -           | - | hypothetical protein                                                 |
| RLPCCGM1_p1542 | -           | - | hypothetical protein                                                 |
| RLPCCGM1_p1545 | -           | E | hypothetical protein                                                 |
| RLPCCGM1_p1550 | -           | G | extracellular solute-binding protein family 1                        |
| RLPCCGM1_p1554 | -           | - | inulin fructotransferase                                             |
| RLPCCGM1_p1556 | -           | R | hypothetical protein                                                 |
| RLPCCGM1_p1558 | <i>stcd</i> | C | oxidoreductase, FMN-binding protein                                  |
| RLPCCGM1_p1562 | -           | P | ABC transporter substrate-binding protein                            |
| RLPCCGM1_p1564 | -           | P | binding-protein-dependent transport systems inner membrane component |
| RLPCCGM1_p1566 | -           | H | hypothetical protein                                                 |
| RLPCCGM1_p1567 | -           | T | two-component response regulator protein                             |
| RLPCCGM1_p1568 | -           | T | two-component sensor histidine kinase                                |
| RLPCCGM1_p1569 | -           | G | sugar ABC transporter substrate-binding protein                      |
| RLPCCGM1_p1571 | -           | G | inner-membrane translocator                                          |
| RLPCCGM1_p1579 | -           | G | extracellular solute-binding protein family 1                        |
| RLPCCGM1_p1581 | -           | - | hypothetical protein                                                 |
| RLPCCGM1_p1582 | -           | S | hypothetical protein                                                 |
| RLPCCGM1_p1584 | -           | Q | hypothetical protein                                                 |
| RLPCCGM1_p1588 | -           | - | hypothetical protein                                                 |
| RLPCCGM1_p1592 | -           | S | hypothetical protein                                                 |
| RLPCCGM1_p1593 | -           | I | bifunctional 3-hydroxyacyl-CoA dehydrogenase/thioesterase            |
| RLPCCGM1_p1594 | -           | I | acyl-CoA dehydrogenase                                               |
| RLPCCGM1_p1595 | -           | C | acyl-CoA synthetase                                                  |
| RLPCCGM1_p1601 | -           | K | Cro/CI family transcriptional regulator                              |
| RLPCCGM1_p1603 | -           | R | peptidase                                                            |
| RLPCCGM1_p1607 | -           | R | hypothetical protein                                                 |
| RLPCCGM1_p1617 | -           | G | sugar ABC transporter substrate-binding protein                      |
| RLPCCGM1_p1618 | -           | - | hypothetical protein                                                 |
| RLPCCGM1_p1619 | -           | T | diguanylate cyclase                                                  |
| RLPCCGM1_p1621 | -           | E | sodium/glucose cotransporter                                         |
| RLPCCGM1_p1624 | -           | T | two-component sensor histidine kinase                                |

|                |             |   |                                                                |
|----------------|-------------|---|----------------------------------------------------------------|
| RLPCCGM1_p1630 | -           | E | homocysteine S-methyltransferase                               |
| RLPCCGM1_p1631 | -           | K | MarR family transcriptional regulator                          |
| RLPCCGM1_p1632 | -           | P | chloride channel protein                                       |
| RLPCCGM1_p1634 | -           | P | aliphatic sulfonate ABC transporter substrate-binding protein  |
| RLPCCGM1_p1638 | -           | G | sugar ABC transporter substrate-binding protein                |
| RLPCCGM1_p1646 | -           | - | hypothetical protein                                           |
| RLPCCGM1_p1647 | -           | G | sugar phosphate isomerase/epimerase                            |
| RLPCCGM1_p1650 | <i>iolH</i> | G | inositol utilization protein H IolH                            |
| RLPCCGM1_p1656 | <i>menG</i> | H | S-adenosylmethionine 2-demethylmenaquinone methyltransferase   |
| RLPCCGM1_p1665 | -           | E | hypothetical protein                                           |
| RLPCCGM1_p1666 | -           | E | hypothetical protein                                           |
| RLPCCGM1_p1667 | -           | - | hypothetical protein                                           |
| RLPCCGM1_p1670 | -           | K | transcriptional regulator, CopG family                         |
| RLPCCGM1_p1672 | -           | G | myo-inositol catabolism protein                                |
| RLPCCGM1_p1677 | -           | E | oxidoreductase                                                 |
| RLPCCGM1_p1692 | -           | - | hypothetical protein                                           |
| RLPCCGM1_p1716 | -           | M | hypothetical protein                                           |
| RLPCCGM1_p1723 | -           | R | hypothetical protein                                           |
| RLPCCGM1_p1724 | -           | - | hypothetical protein                                           |
| RLPCCGM1_p1725 | -           | - | hypothetical protein                                           |
| RLPCCGM1_p1726 | -           | - | hypothetical protein                                           |
| RLPCCGM1_p1727 | -           | T | membrane protein                                               |
| RLPCCGM1_p1728 | -           | - | hypothetical protein                                           |
| RLPCCGM1_p1729 | -           | - | hypothetical protein                                           |
| RLPCCGM1_p1730 | -           | S | hypothetical protein                                           |
| RLPCCGM1_p1731 | -           | P | FAD-dependent pyridine nucleotide-disulfide oxidoreductase     |
| RLPCCGM1_p1733 | -           | S | hypothetical protein                                           |
| RLPCCGM1_p1734 | -           | - | hypothetical protein                                           |
| RLPCCGM1_p1736 | -           | - | ABC transporter integral membrane protein                      |
| RLPCCGM1_p1739 | -           | - | lipoprotein                                                    |
| RLPCCGM1_p1741 | -           | T | sensory histidine kinase QseC                                  |
| RLPCCGM1_p1742 | -           | K | phosphosugar isomerase                                         |
| RLPCCGM1_p1743 | -           | S | transmembrane protein                                          |
| RLPCCGM1_p1744 | -           | T | hypothetical protein                                           |
| RLPCCGM1_p1746 | -           | - | permeases of the drug/metabolite transporter (DMT) superfamily |
| RLPCCGM1_p1747 | -           | - | hypothetical protein                                           |
| RLPCCGM1_p1748 | -           | R | carboxylesterase                                               |
| RLPCCGM1_p1749 | -           | - | fatty acid desaturase                                          |
| RLPCCGM1_p1750 | -           | G | hypothetical protein                                           |
| RLPCCGM1_p1751 | -           | - | hypothetical protein                                           |
| RLPCCGM1_p1753 | -           | E | phosphoserine phosphatase                                      |
| RLPCCGM1_p1758 | <i>rbsB</i> | G | ribose ABC transporter, substrate-binding protein              |
| RLPCCGM1_p1762 | -           | K | GreA/GreB family elongation factor                             |
| RLPCCGM1_p1763 | <i>rnk</i>  | K | regulator of nucleoside diphosphate kinase                     |
| RLPCCGM1_p1768 | -           | - | cell division protein FtsH                                     |
| RLPCCGM1_p1775 | -           | - | hypothetical protein                                           |
| RLPCCGM1_p1788 | -           | - | hypothetical protein                                           |
| RLPCCGM1_p1789 | -           | - | hypothetical protein                                           |
| RLPCCGM1_p1827 | -           | - | hypothetical protein                                           |
| RLPCCGM1_p1838 | -           | L | IS3 family transposase                                         |
| RLPCCGM1_p1846 | -           | - | hypothetical protein                                           |
| RLPCCGM1_p1857 | <i>cheR</i> | N | chemotaxis methyltransferase                                   |
| RLPCCGM1_p1858 | <i>cheB</i> | N | chemotaxis protein-glutamate methyltransferase                 |
| RLPCCGM1_p1860 | -           | T | two-component response regulator protein                       |

|                |             |   |                                                          |
|----------------|-------------|---|----------------------------------------------------------|
| RLPCCGM1_p1868 | -           | T | two-component sensor histidine kinase                    |
| RLPCCGM1_p1875 | -           | - | hypothetical protein                                     |
| RLPCCGM1_p1877 | -           | S | hypothetical protein                                     |
| RLPCCGM1_p1888 | -           | S | hypothetical protein                                     |
| RLPCCGM1_p1901 | -           | L | insertion sequence transposase                           |
| RLPCCGM1_p1942 | -           | - | transmembrane protein                                    |
| RLPCCGM1_p1946 | -           | - | hypothetical protein                                     |
| RLPCCGM1_p1949 | -           | G | extracellular solute-binding protein family 1            |
| RLPCCGM1_p1971 | -           | - | hypothetical protein                                     |
| RLPCCGM1_p2011 | -           | Q | isochorismatase                                          |
| RLPCCGM1_p2022 | -           | H | dimethylmenaquinone methyltransferase                    |
| RLPCCGM1_p2023 | -           | K | IclR family transcriptional regulator                    |
| RLPCCGM1_p2024 | -           | E | dipeptide-binding ABC transporter                        |
| RLPCCGM1_p2029 | -           | - | hypothetical protein                                     |
| RLPCCGM1_p2030 | -           | G | hypothetical protein                                     |
| RLPCCGM1_p2032 | -           | T | sensory box/GGDEF family protein                         |
| RLPCCGM1_p2033 | -           | - | hypothetical protein                                     |
| RLPCCGM1_p2035 | <i>cpaB</i> | U | CpaB pilus assembly protein                              |
| RLPCCGM1_p2038 | -           | - | hypothetical protein                                     |
| RLPCCGM1_p2039 | -           | U | hypothetical protein                                     |
| RLPCCGM1_p2040 | -           | U | hypothetical protein                                     |
| RLPCCGM1_p2041 | -           | U | pilus assembly protein                                   |
| RLPCCGM1_p2046 | -           | O | AAA ATPase                                               |
| RLPCCGM1_p2047 | -           | - | hypothetical protein                                     |
| RLPCCGM1_p2048 | -           | U | hypothetical protein                                     |
| RLPCCGM1_p2049 | <i>nfeD</i> | O | nodulation competitiveness protein nfeD                  |
| RLPCCGM1_p2050 | -           | O | hypothetical protein                                     |
| RLPCCGM1_p2058 | -           | K | AraC family transcriptional regulator                    |
| RLPCCGM1_p2060 | -           | K | GCN5 N-acetyltransferase                                 |
| RLPCCGM1_p2067 | -           | I | MaoC dehydratase family protein                          |
| RLPCCGM1_p2070 | <i>cpxA</i> | T | sensor protein CpxA                                      |
| RLPCCGM1_p2072 | -           | M | efflux cation transporter protein                        |
| RLPCCGM1_p2074 | -           | - | hypothetical protein                                     |
| RLPCCGM1_p2076 | -           | - | hypothetical protein                                     |
| RLPCCGM1_p2077 | -           | G | hypothetical protein                                     |
| RLPCCGM1_p2078 | -           | G | 5-deoxy-glucuronate isomerase                            |
| RLPCCGM1_p2088 | -           | - | Leu/Ile/Val-binding protein                              |
| RLPCCGM1_p2090 | <i>livH</i> | E | branched-chain amino acid ABC transporter                |
| RLPCCGM1_p2092 | -           | C | hypothetical protein                                     |
| RLPCCGM1_p2097 | -           | - | alpha-L-rhamnosidase                                     |
| RLPCCGM1_p2098 | -           | G | extracellular solute-binding protein family 1            |
| RLPCCGM1_p2104 | <i>gmhA</i> | G | phosphoheptose isomerase                                 |
| RLPCCGM1_p2105 | -           | M | glycosyl transferase family 2                            |
| RLPCCGM1_p2106 | -           | - | hypothetical protein                                     |
| RLPCCGM1_p2107 | -           | - | hypothetical protein                                     |
| RLPCCGM1_p2109 | -           | E | histidinol-phosphate phosphatase family protein          |
| RLPCCGM1_p2110 | -           | R | GHMP kinase                                              |
| RLPCCGM1_p2111 | -           | M | NAD-dependent epimerase/dehydratase                      |
| RLPCCGM1_p2112 | -           | - | FAD dependent oxidoreductase                             |
| RLPCCGM1_p2113 | -           | P | hypothetical protein                                     |
| RLPCCGM1_p2119 | -           | - | hypothetical protein                                     |
| RLPCCGM1_p2125 | -           | L | hypothetical protein                                     |
| RLPCCGM1_p2127 | -           | S | hypothetical protein                                     |
| RLPCCGM1_p2128 | <i>tauA</i> | P | taurine uptake ABC transporter substrate-binding protein |

|                |             |   |                                                           |
|----------------|-------------|---|-----------------------------------------------------------|
| RLPCCGM1_p2132 | -           | - | hypothetical protein                                      |
| RLPCCGM1_p2137 | -           | Q | 2-hydroxychromene-2-carboxylate isomerase                 |
| RLPCCGM1_p2138 | -           | C | oxidoreductase                                            |
| RLPCCGM1_p2140 | -           | E | periplasmic binding protein                               |
| RLPCCGM1_p2141 | -           | E | amino acid ABC transporter substrate-binding protein      |
| RLPCCGM1_p2143 | -           | K | acetyltransferase                                         |
| RLPCCGM1_p2146 | -           | C | oxidoreductase                                            |
| RLPCCGM1_p2149 | -           | - | hypothetical protein                                      |
| RLPCCGM1_p2154 | -           | K | hypothetical protein                                      |
| RLPCCGM1_p2155 | <i>otsB</i> | G | trehalose-phosphatase                                     |
| RLPCCGM1_p2159 | -           | G | sugar ABC transporter permease                            |
| RLPCCGM1_p2163 | -           | G | 4-hydroxyphenylpyruvate dioxygenase                       |
| RLPCCGM1_p2165 | -           | G | extracytoplasmic solute receptor of TRAP-transport system |
| RLPCCGM1_p2167 | -           | G | small transmembrane subunit, TRAP-transport system        |
| RLPCCGM1_p2169 | -           | T | two-component sensor histidine kinase                     |
| RLPCCGM1_p2171 | -           | - | hypothetical protein                                      |
| RLPCCGM1_p2176 | -           | L | hypothetical protein                                      |
| RLPCCGM1_p2177 | -           | R | general stress protein 26                                 |
| RLPCCGM1_p2180 | -           | S | UDP-galactose-lipid carrier transferase                   |
| RLPCCGM1_p2182 | -           | L | hypothetical protein                                      |
| RLPCCGM1_p2183 | -           | - | hypothetical protein                                      |

### ***Sinorhizobium americanum* CCGM7**

| <b>ID</b>       | <b>Name</b> | <b>COG</b> | <b>Function</b>                                   |
|-----------------|-------------|------------|---------------------------------------------------|
| SAMCCGM7_Ch0113 | -           | -          | hypothetical protein                              |
| SAMCCGM7_Ch0198 | -           | R          | glutamate synthase [NADPH] large chain            |
| SAMCCGM7_Ch0278 | <i>ftsK</i> | D          | cell division protein FtsK                        |
| SAMCCGM7_Ch0823 | -           | -          | hypothetical protein                              |
| SAMCCGM7_Ch0897 | -           | E          | transporter, LysE family                          |
| SAMCCGM7_Ch0913 | -           | -          | hypothetical protein                              |
| SAMCCGM7_Ch0937 | -           | R          | acetyltransferase                                 |
| SAMCCGM7_Ch0973 | -           | -          | hypothetical protein                              |
| SAMCCGM7_Ch1414 | <i>smf</i>  | L          | DNA processing protein DprA                       |
| SAMCCGM7_Ch1426 | -           | -          | hypothetical protein                              |
| SAMCCGM7_Ch1804 | -           | S          | rhamnosyltransferase family protein               |
| SAMCCGM7_Ch2020 | -           | -          | hypothetical protein                              |
| SAMCCGM7_Ch2023 | -           | -          | hypothetical protein                              |
| SAMCCGM7_Ch2148 | -           | R          | secretion activator protein                       |
| SAMCCGM7_Ch2150 | -           | -          | hypothetical protein                              |
| SAMCCGM7_Ch2151 | -           | R          | methyltransferase                                 |
| SAMCCGM7_Ch2207 | -           | -          | hypothetical protein                              |
| SAMCCGM7_Ch2217 | -           | -          | hypothetical protein                              |
| SAMCCGM7_Ch2238 | -           | R          | SAM-dependent methyltransferase protein           |
| SAMCCGM7_Ch2240 | -           | R          | aldo/keto reductase                               |
| SAMCCGM7_Ch2248 | -           | -          | hypothetical protein                              |
| SAMCCGM7_Ch2256 | -           | Q          | 2-hydroxychromene-2-carboxylate isomerase protein |
| SAMCCGM7_Ch2365 | -           | E          | N-methyl-l-tryptophan oxidase                     |
| SAMCCGM7_Ch2642 | -           | -          | hypothetical protein                              |
| SAMCCGM7_Ch2702 | -           | L          | DNA methylase                                     |
| SAMCCGM7_Ch2825 | -           | N          | type IV pilus assembly protein                    |
| SAMCCGM7_Ch2829 | -           | O          | GTP-binding protein EngA                          |
| SAMCCGM7_Ch2975 | -           | R          | multidrug transporter                             |
| SAMCCGM7_Ch3017 | -           | -          | hypothetical protein                              |
| SAMCCGM7_Ch3097 | -           | R          | NADH dehydrogenase                                |

|                 |             |   |                                                            |
|-----------------|-------------|---|------------------------------------------------------------|
| SAMCCGM7_Ch3363 | -           | C | cytochrome c peroxidase                                    |
| SAMCCGM7_Ch3364 | -           | C | cytochrome c peroxidase                                    |
| SAMCCGM7_Ch3409 | -           | - | hypothetical protein                                       |
| SAMCCGM7_Ch3413 | -           | V | type I restriction enzyme MjaXP M protein                  |
| SAMCCGM7_Ch3414 | -           | V | restriction endonuclease S subunit                         |
| SAMCCGM7_Ch3415 | -           | V | type I restriction enzyme hindVIIP R protein               |
| SAMCCGM7_Ch3416 | -           | R | metal-dependent hydrolase                                  |
| SAMCCGM7_Ch3419 | -           | - | hypothetical protein                                       |
| SAMCCGM7_Ch3420 | -           | - | hypothetical protein                                       |
| SAMCCGM7_Ch3421 | -           | - | hypothetical protein                                       |
| SAMCCGM7_Ch3424 | -           | - | hypothetical protein                                       |
| SAMCCGM7_Ch3426 | -           | L | integrase family protein                                   |
| SAMCCGM7_Ch3465 | -           | R | AAA ATPase                                                 |
| SAMCCGM7_Ch3466 | -           | R | ATPase associated with various cellular activity, AAA_5    |
| SAMCCGM7_Ch3499 | <i>ligT</i> | J | 2'-5' RNA ligase                                           |
| SAMCCGM7_Ch3542 | -           | - | hypothetical protein                                       |
| SAMCCGM7_Ch3594 | -           | - | hypothetical protein                                       |
| SAMCCGM7_pA0005 | -           | - | hypothetical protein                                       |
| SAMCCGM7_pA0011 | -           | L | hypothetical protein                                       |
| SAMCCGM7_pA0012 | -           | L | hypothetical protein                                       |
| SAMCCGM7_pA0013 | -           | - | hypothetical protein                                       |
| SAMCCGM7_pA0015 | -           | J | hypothetical protein                                       |
| SAMCCGM7_pA0020 | -           | X | transposase                                                |
| SAMCCGM7_pA0021 | -           | L | transposase                                                |
| SAMCCGM7_pA0023 | -           | - | hypothetical protein                                       |
| SAMCCGM7_pA0025 | -           | - | hypothetical protein                                       |
| SAMCCGM7_pA0026 | -           | - | hypothetical protein                                       |
| SAMCCGM7_pA0037 | <i>impM</i> | S | phosphatase ImpM                                           |
| SAMCCGM7_pA0052 | -           | - | hypothetical protein                                       |
| SAMCCGM7_pA0057 | -           | - | hypothetical protein                                       |
| SAMCCGM7_pA0070 | <i>parA</i> | N | ParA protein, plasmid partitioning protein                 |
| SAMCCGM7_pA0079 | -           | R | NAD(P)H dehydrogenase                                      |
| SAMCCGM7_pA0081 | -           | H | pyridoxamine 5'-phosphate oxidase                          |
| SAMCCGM7_pA0121 | <i>aacC</i> | V | aminoglycoside N(3')-acetyltransferase III                 |
| SAMCCGM7_pA0131 | -           | E | sarcosine dehydrogenase                                    |
| SAMCCGM7_pA0133 | -           | E | saccharopine dehydrogenase                                 |
| SAMCCGM7_pA0134 | -           | I | choline kinase                                             |
| SAMCCGM7_pA0136 | -           | F | hydroxymethylpyrimidine transporter CytX                   |
| SAMCCGM7_pA0137 | -           | K | TetR family transcriptional regulator                      |
| SAMCCGM7_pA0140 | -           | R | 3-keto-5-aminohexanoate cleavage enzyme                    |
| SAMCCGM7_pA0141 | -           | R | saccharopine dehydrogenase                                 |
| SAMCCGM7_pA0142 | <i>lpsI</i> | I | succinyl-CoA:3-ketoacid coenzyme A transferase subunit A   |
| SAMCCGM7_pA0143 | <i>lpsJ</i> | I | succinyl-CoA:3-ketoacid coenzyme A transferase subunit B   |
| SAMCCGM7_pA0182 | -           | - | hypothetical protein                                       |
| SAMCCGM7_pA0234 | -           | R | short-chain dehydrogenase/reductase SDR                    |
| SAMCCGM7_pA0235 | -           | K | TetR family transcriptional regulator                      |
| SAMCCGM7_pA0286 | -           | - | hypothetical protein                                       |
| SAMCCGM7_pA0294 | <i>fabG</i> | I | 3-oxoacyl-[acyl-carrier protein] reductase                 |
| SAMCCGM7_pA0295 | -           | J | cytidine/deoxycytidylate deaminase family protein          |
| SAMCCGM7_pA0297 | <i>ubiE</i> | H | ubiquinone/menaquinone biosynthesis methyltransferase UbiE |
| SAMCCGM7_pA0298 | -           | E | L-asparaginase                                             |
| SAMCCGM7_pA0301 | -           | - | hypothetical protein                                       |
| SAMCCGM7_pA0302 | -           | P | alkaline phosphatase                                       |
| SAMCCGM7_pA0303 | -           | K | two component system response regulator                    |

|                 |             |   |                                                                        |
|-----------------|-------------|---|------------------------------------------------------------------------|
| SAMCCGM7_pA0304 | -           | K | hypothetical protein                                                   |
| SAMCCGM7_pA0311 | -           | K | transcriptional regulator, AraC family protein                         |
| SAMCCGM7_pA0315 | -           | K | transcriptional regulator, AraC family                                 |
| SAMCCGM7_pA0316 | -           | O | hypothetical protein                                                   |
| SAMCCGM7_pA0318 | -           | C | NADPH:quinone oxidoreductase                                           |
| SAMCCGM7_pA0353 | <i>cya</i>  | K | adenylate cyclase                                                      |
| SAMCCGM7_pA0354 | <i>cya</i>  | K | adenylate cyclase                                                      |
| SAMCCGM7_pA0357 | -           | U | T1SS secreted agglutinin RTX                                           |
| SAMCCGM7_pA0368 | -           | R | plasmid stabilization protein                                          |
| SAMCCGM7_pA0371 | -           | D | ParB domain protein nuclease                                           |
| SAMCCGM7_pB0011 | -           | - | hypothetical protein                                                   |
| SAMCCGM7_pB0012 | -           | - | hypothetical protein                                                   |
| SAMCCGM7_pB0023 | -           | X | ISSod11, transposase                                                   |
| SAMCCGM7_pB0029 | <i>traH</i> | L | conjugal transfer protein TraH                                         |
| SAMCCGM7_pB0066 | <i>nodS</i> | Q | nodulation protein NodS                                                |
| SAMCCGM7_pB0096 | -           | - | hypothetical protein                                                   |
| SAMCCGM7_pB0097 | -           | - | hypothetical protein                                                   |
| SAMCCGM7_pB0098 | -           | R | extracellular protease                                                 |
| SAMCCGM7_pB0101 | -           | R | serine protease, subtilase family                                      |
| SAMCCGM7_pB0102 | -           | - | hypothetical protein                                                   |
| SAMCCGM7_pB0103 | -           | - | hypothetical protein                                                   |
| SAMCCGM7_pB0105 | -           | - | hypothetical protein                                                   |
| SAMCCGM7_pB0116 | <i>rpiR</i> | K | HTH-type transcriptional regulator RpiR                                |
| SAMCCGM7_pB0140 | -           | X | transposase                                                            |
| SAMCCGM7_pB0141 | -           | X | transposase                                                            |
| SAMCCGM7_pB0146 | -           | - | hypothetical protein                                                   |
| SAMCCGM7_pB0172 | -           | X | transposase for insertion sequence element IS1081                      |
| SAMCCGM7_pB0175 | -           | X | transposase                                                            |
| SAMCCGM7_pB0176 | -           | X | transposase                                                            |
| SAMCCGM7_pB0181 | -           | X | transposase                                                            |
| SAMCCGM7_pB0183 | -           | X | transposase                                                            |
| SAMCCGM7_pB0185 | -           | X | transposase                                                            |
| SAMCCGM7_pB0187 | -           | X | transposase                                                            |
| SAMCCGM7_pB0198 | -           | X | transposase for insertion sequence NGRIS-18a                           |
| SAMCCGM7_pB0201 | <i>murE</i> | M | UDP-N-acetylmuramoyl-L-alanyl-D-glutamate--2, 6-diaminopimelate ligase |
| SAMCCGM7_pB0203 | -           | E | binding-protein-dependent transport system inner membrane protein      |
| SAMCCGM7_pB0205 | -           | R | succinate dehydrogenase subunit                                        |
| SAMCCGM7_pB0209 | -           | K | IclR family transcriptional regulator                                  |
| SAMCCGM7_pB0210 | -           | X | integrase/recombinase y4rC                                             |
| SAMCCGM7_pB0213 | <i>ddpA</i> | E | D,D-dipeptide-binding periplasmic protein DdpA                         |
| SAMCCGM7_pB0220 | -           | M | peptidase M14                                                          |
| SAMCCGM7_pB0222 | -           | X | transposase                                                            |
| SAMCCGM7_pB0226 | -           | X | transposase                                                            |
| SAMCCGM7_pB0228 | -           | X | transposase                                                            |
| SAMCCGM7_pB0232 | -           | X | transposase                                                            |
| SAMCCGM7_pB0236 | <i>ocd</i>  | E | ornithine cyclodeaminase 1                                             |
| SAMCCGM7_pB0238 | -           | E | D-serine deaminase                                                     |
| SAMCCGM7_pB0240 | <i>argE</i> | E | acetylorithine deacetylase                                             |
| SAMCCGM7_pB0243 | -           | L | transposase number 4 for insertion sequence NGRIS-4e                   |
| SAMCCGM7_pB0248 | -           | R | hypothetical protein                                                   |
| SAMCCGM7_pB0249 | -           | H | hypothetical protein                                                   |
| SAMCCGM7_pB0250 | -           | - | hypothetical protein                                                   |
| SAMCCGM7_pB0263 | -           | E | amino acid ABC transporter permease protein                            |

|                 |             |   |                                                          |
|-----------------|-------------|---|----------------------------------------------------------|
| SAMCCGM7_pB0267 | -           | - | hypothetical protein                                     |
| SAMCCGM7_pB0268 | -           | J | archaeosine tRNA-ribosyltransferase type 5               |
| SAMCCGM7_pB0269 | -           | - | hypothetical protein                                     |
| SAMCCGM7_pB0270 | -           | R | queuosine Biosynthesis QueE Radical SAM                  |
| SAMCCGM7_pB0275 | -           | - | hypothetical protein                                     |
| SAMCCGM7_pB0277 | -           | - | hypothetical protein                                     |
| SAMCCGM7_pB0278 | -           | - | hypothetical protein                                     |
| SAMCCGM7_pB0283 | -           | H | monooxygenase                                            |
| SAMCCGM7_pB0288 | -           | X | transposase                                              |
| SAMCCGM7_pB0294 | <i>npt</i>  | H | 4'-phosphopantetheinyl transferase Npt                   |
| SAMCCGM7_pB0301 | -           | X | transposase                                              |
| SAMCCGM7_pB0321 | -           | R | transcriptional regulator, AraC family                   |
| SAMCCGM7_pB0365 | <i>hupB</i> | C | uptake hydrogenase large subunit                         |
| SAMCCGM7_pB0368 | <i>chrA</i> | P | chromate transport protein ChrA                          |
| SAMCCGM7_pB0375 | -           | R | phosphatase                                              |
| SAMCCGM7_pB0422 | -           | E | polar amino acid ABC transporter, inner membrane subunit |
| SAMCCGM7_pB0436 | -           | - | hypothetical protein                                     |
| SAMCCGM7_pB0437 | -           | K | transcriptional regulator, TetR family                   |
| SAMCCGM7_pB0448 | <i>pgl</i>  | G | 6-phosphogluconolactonase                                |
| SAMCCGM7_pB0467 | -           | - | hypothetical protein                                     |
| SAMCCGM7_pC0022 | -           | K | transcriptional regulator, TetR family                   |
| SAMCCGM7_pC0023 | -           | G | cupin domain-containing protein                          |
| SAMCCGM7_pC0126 | -           | X | phage DNA invertase                                      |
| SAMCCGM7_pC0135 | -           | - | hypothetical protein                                     |
| SAMCCGM7_pC0136 | -           | T | DNA helicase, UvrD/REP family                            |
| SAMCCGM7_pC0137 | <i>dnaK</i> | O | chaperone protein DnaK                                   |
| SAMCCGM7_pC0138 | -           | - | hypothetical protein                                     |
| SAMCCGM7_pC0139 | -           | - | hypothetical protein                                     |
| SAMCCGM7_pC0144 | <i>catB</i> | M | muconate cycloisomerase 1-1                              |
| SAMCCGM7_pC0146 | <i>catA</i> | Q | catechol 1,2-dioxygenase                                 |
| SAMCCGM7_pC0147 | <i>cbdA</i> | P | 2-halobenzoate 1,2-dioxygenase large subunit             |
| SAMCCGM7_pC0148 | <i>xyly</i> | Q | toluate 1,2-dioxygenase subunit beta                     |
| SAMCCGM7_pC0149 | <i>benC</i> | H | benzoate 1,2-dioxygenase electron transfer component     |
| SAMCCGM7_pC0151 | <i>benK</i> | G | benzoate transport protein BenK                          |
| SAMCCGM7_pC0154 | -           | E | creatinase                                               |
| SAMCCGM7_pC0155 | <i>crnA</i> | H | creatinine amidohydrolase                                |
| SAMCCGM7_pC0157 | -           | E | ABC transporter substrate-binding protein                |
| SAMCCGM7_pC0162 | -           | X | ISSod11, transposase                                     |
| SAMCCGM7_pC0166 | <i>mntH</i> | P | manganese transport protein MntH                         |
| SAMCCGM7_pC0168 | -           | - | hypothetical protein                                     |
| SAMCCGM7_pC0169 | <i>phaZ</i> | Q | poly(3-hydroxyalkanoate) depolymerase C                  |
| SAMCCGM7_pC0170 | -           | K | hypothetical protein                                     |
| SAMCCGM7_pC0171 | <i>cheR</i> | N | chemotaxis protein methyltransferase CheR                |
| SAMCCGM7_pC0174 | -           | G | inosose isomerase                                        |
| SAMCCGM7_pC0175 | -           | - | hypothetical protein                                     |
| SAMCCGM7_pC0181 | -           | R | copper oxidase                                           |
| SAMCCGM7_pC0182 | -           | D | multicopper oxidase type 3                               |
| SAMCCGM7_pC0183 | -           | M | copper resistance-like lipoprotein                       |
| SAMCCGM7_pC0186 | -           | - | hypothetical protein                                     |
| SAMCCGM7_pC0190 | -           | - | hypothetical protein                                     |
| SAMCCGM7_pC0191 | -           | R | surface polysaccharides/antigen                          |
| SAMCCGM7_pC0200 | -           | X | integrase/recombinase y4rB                               |
| SAMCCGM7_pC0202 | -           | X | transposase IS3/IS911 family protein                     |
| SAMCCGM7_pC0203 | -           | - | hypothetical protein                                     |

|                 |             |   |                                                                                    |
|-----------------|-------------|---|------------------------------------------------------------------------------------|
| SAMCCGM7_pC0204 | <i>hipA</i> | T | serine/threonine-protein kinase HipA                                               |
| SAMCCGM7_pC0206 | -           | R | diguanylate cyclase/phosphodiesterase (GGDEF & EAL domains) with PAS/PAC sensor(s) |
| SAMCCGM7_pC0210 | -           | G | DMT superfamily inner membrane transporter protein                                 |
| SAMCCGM7_pC0212 | -           | O | hypothetical protein                                                               |
| SAMCCGM7_pC0214 | -           | - | hypothetical protein                                                               |
| SAMCCGM7_pC0228 | -           | K | transcriptional regulator                                                          |
| SAMCCGM7_pC0266 | -           | H | hydrolase                                                                          |
| SAMCCGM7_pC0272 | -           | - | hypothetical protein                                                               |
| SAMCCGM7_pC0273 | -           | T | TspO/MBR-related protein                                                           |
| SAMCCGM7_pC0275 | -           | R | beta-Ig-H3/fasciclin                                                               |
| SAMCCGM7_pC0276 | -           | G | transcriptional regulator                                                          |
| SAMCCGM7_pC0278 | -           | H | hypothetical protein                                                               |
| SAMCCGM7_pC0300 | -           | - | hypothetical protein                                                               |
| SAMCCGM7_pC0307 | -           | S | copper metallochaperone                                                            |
| SAMCCGM7_pC0309 | -           | P | copper binding protein                                                             |
| SAMCCGM7_pC0312 | -           | S | DoxX family protein                                                                |
| SAMCCGM7_pC0314 | -           | R | exoenzymes regulatory protein AepA precursor                                       |
| SAMCCGM7_pC0316 | -           | H | hydrolase                                                                          |
| SAMCCGM7_pC0319 | -           | V | endoribonuclease L-PSP                                                             |
| SAMCCGM7_pC0321 | <i>ftsH</i> | D | cell division protein FtsH                                                         |
| SAMCCGM7_pC0328 | -           | K | transcriptional regulator                                                          |
| SAMCCGM7_pC0332 | -           | R | NAD(P)H dehydrogenase, quinone family, Nqo1-like                                   |
| SAMCCGM7_pC0336 | -           | H | isochorismatase                                                                    |
| SAMCCGM7_pC0343 | -           | R | CHRD protein                                                                       |
| SAMCCGM7_pC0346 | -           | - | hypothetical protein                                                               |
| SAMCCGM7_pC0351 | -           | S | hypothetical protein                                                               |
| SAMCCGM7_pC0352 | -           | X | transposase                                                                        |
| SAMCCGM7_pC0354 | -           | X | transposase                                                                        |
| SAMCCGM7_pC0357 | <i>prf</i>  | C | gamma-aminobutyrate:alpha-ketoglutarate aminotransferase                           |
| SAMCCGM7_pC0363 | -           | R | histone acetyltransferase HPA2                                                     |
| SAMCCGM7_pC0364 | -           | P | Na <sup>+</sup> /H <sup>+</sup> antiporter protein                                 |
| SAMCCGM7_pC0439 | -           | E | glutamate synthase [NADPH] large chain                                             |
| SAMCCGM7_pC0492 | <i>aprE</i> | O | subtilisin E                                                                       |
| SAMCCGM7_pC0547 | -           | - | hypothetical protein                                                               |
| SAMCCGM7_pC0548 | -           | C | pseudoazurin                                                                       |
| SAMCCGM7_pC0549 | -           | K | sensory box sensor histidine kinase/response regulator                             |
| SAMCCGM7_pC0550 | -           | K | HTH-type transcriptional regulator                                                 |
| SAMCCGM7_pC0557 | <i>hpaH</i> | Q | 2-oxo-hepta-3-ene-1,7-dioic acid hydratase                                         |
| SAMCCGM7_pC0560 | -           | G | sugar phosphate isomerases/epimerase                                               |
| SAMCCGM7_pC0566 | -           | M | 5-carboxymethyl-2-hydroxymuconate delta-isomerase                                  |
| SAMCCGM7_pC0568 | -           | R | oxidoreductase                                                                     |
| SAMCCGM7_pC0573 | -           | H | epoxide hydrolase                                                                  |
| SAMCCGM7_pC0574 | -           | H | epoxide hydrolase                                                                  |
| SAMCCGM7_pC0585 | -           | I | hydrolase                                                                          |
| SAMCCGM7_pC0588 | -           | S | membrane protein                                                                   |
| SAMCCGM7_pC0589 | -           | K | TetR family transcriptional regulator                                              |
| SAMCCGM7_pC0602 | -           | E | acetyltransferase                                                                  |
| SAMCCGM7_pC0609 | <i>pdxA</i> | R | 4-hydroxythreonine-4-phosphate dehydrogenase                                       |
| SAMCCGM7_pC0611 | -           | S | inner membrane protein                                                             |
| SAMCCGM7_pC0631 | -           | X | transposase                                                                        |
| SAMCCGM7_pC0638 | -           | E | metal-activated pyridoxal enzyme                                                   |
| SAMCCGM7_pC0645 | <i>thrA</i> | E | homoserine dehydrogenase                                                           |
| SAMCCGM7_pC0655 | -           | E | acetyltransferase                                                                  |



|                 |             |   |                                                                                             |
|-----------------|-------------|---|---------------------------------------------------------------------------------------------|
| SAMCCGM7_pC0657 | -           | K | GntR family transcriptional regulator                                                       |
| SAMCCGM7_pC0659 | -           | T | homoserine kinase type II                                                                   |
| SAMCCGM7_pC0662 | -           | T | multi-sensor signal transduction multi-kinase                                               |
| SAMCCGM7_pC0673 | -           | T | transmembrane sensory box GGDEF/EAL family protein                                          |
| SAMCCGM7_pC0675 | -           | Q | glyoxalase                                                                                  |
| SAMCCGM7_pC0676 | -           | J | histone acetyltransferase HPA2                                                              |
| SAMCCGM7_pC0686 | -           | H | isochorismatase                                                                             |
| SAMCCGM7_pC0690 | -           | O | isoprenylcysteine carboxyl methyltransferase                                                |
| SAMCCGM7_pC0693 | -           | M | NodT, RND efflux system, outer membrane lipoprotein                                         |
| SAMCCGM7_pC0694 | -           | R | hypothetical protein                                                                        |
| SAMCCGM7_pC0695 | -           | M | MltA-interacting MipA family protein                                                        |
| SAMCCGM7_pC0697 | -           | T | histidine kinase                                                                            |
| SAMCCGM7_pC0698 | -           | - | hypothetical protein                                                                        |
| SAMCCGM7_pC0702 | -           | R | beta-lactamase domain containing protein                                                    |
| SAMCCGM7_pC0713 | -           | I | lipase                                                                                      |
| SAMCCGM7_pC0714 | -           | H | signal peptide protein                                                                      |
| SAMCCGM7_pC0721 | -           | P | sulfonate ABC transporter substrate-binding protein                                         |
| SAMCCGM7_pC0740 | -           | - | hypothetical protein                                                                        |
| SAMCCGM7_pC0741 | -           | R | methyltransferase type 11                                                                   |
| SAMCCGM7_pC0745 | -           | R | NAD(P)H dehydrogenase                                                                       |
| SAMCCGM7_pC0747 | -           | H | pyridoxamine 5'-phosphate oxidase                                                           |
| SAMCCGM7_pC0748 | <i>soxY</i> | S | sulfur oxidation protein SoxY                                                               |
| SAMCCGM7_pC0749 | <i>soxZ</i> | R | sulfur oxidation Z protein SoxZ                                                             |
| SAMCCGM7_pC0750 | -           | C | cytochrome c553                                                                             |
| SAMCCGM7_pC0751 | <i>fccB</i> | I | sulfide dehydrogenase (flavocytochrome C) flavoprotein subunit                              |
| SAMCCGM7_pC0753 | -           | C | hypothetical protein                                                                        |
| SAMCCGM7_pC0754 | -           | T | metallophosphoesterase                                                                      |
| SAMCCGM7_pC0755 | -           | C | lipoprotein                                                                                 |
| SAMCCGM7_pC0761 | <i>fixN</i> | C | cytochrome c oxidase subunit 1                                                              |
| SAMCCGM7_pC0762 | <i>fixO</i> | C | cytochrome C oxidase mono-heme subunit/FixO                                                 |
| SAMCCGM7_pC0766 | -           | P | heavy-metal-associated domain                                                               |
| SAMCCGM7_pC0769 | -           | C | cytochrome c peroxidase                                                                     |
| SAMCCGM7_pC0778 | -           | G | major facilitator superfamily protein                                                       |
| SAMCCGM7_pC0781 | -           | P | high-affinity nickel-transporter                                                            |
| SAMCCGM7_pC0782 | -           | S | inner membrane protein                                                                      |
| SAMCCGM7_pC0783 | -           | G | hypothetical protein                                                                        |
| SAMCCGM7_pC0787 | <i>nikA</i> | E | nickel-binding periplasmic protein NikA                                                     |
| SAMCCGM7_pC0788 | -           | K | sensor histidine kinase domain-containing protein                                           |
| SAMCCGM7_pC0798 | -           | R | carboxymuconolactone decarboxylase                                                          |
| SAMCCGM7_pC0799 | -           | K | LysR family transcriptional regulator                                                       |
| SAMCCGM7_pC0816 | -           | - | hypothetical protein                                                                        |
| SAMCCGM7_pC0817 | <i>ligD</i> | L | ATP-dependent DNA ligase                                                                    |
| SAMCCGM7_pC0819 | <i>prtC</i> | V | serralysin C                                                                                |
| SAMCCGM7_pC0821 | -           | X | transposase                                                                                 |
| SAMCCGM7_pC0823 | <i>ligD</i> | L | ATP-dependent DNA ligase                                                                    |
| SAMCCGM7_pC0826 | -           | - | hypothetical protein                                                                        |
| SAMCCGM7_pC0827 | -           | - | hypothetical protein                                                                        |
| SAMCCGM7_pC0831 | -           | - | hypothetical protein                                                                        |
| SAMCCGM7_pC0834 | <i>lpsZ</i> | M | lipopolysaccharide-processing protein LpsZ                                                  |
| SAMCCGM7_pC0835 | <i>rkpL</i> | M | polysaccharide biosynthesis protein UDP-4-dehydro-6-deoxy-2-acetamido-D-glucose 4-reductase |
| SAMCCGM7_pC0837 | <i>rkpN</i> | M | acylneuraminate cytidyltransferase                                                          |
| SAMCCGM7_pC0838 | <i>rkpO</i> | M | polysaccharide biosynthesis protein                                                         |
| SAMCCGM7_pC0843 | <i>lpsZ</i> | M | lipopolysaccharide-processing protein LpsZ                                                  |

|                 |             |   |                                                            |
|-----------------|-------------|---|------------------------------------------------------------|
| SAMCCGM7_pC0847 | -           | R | ATPase                                                     |
| SAMCCGM7_pC0848 | -           | R | filamentation induced by cAMP protein Fic                  |
| SAMCCGM7_pC0850 | -           | R | filamentation induced by cAMP protein Fic                  |
| SAMCCGM7_pC0872 | -           | - | hypothetical protein                                       |
| SAMCCGM7_pC0873 | <i>betA</i> | C | FAD dependent oxidoreductase                               |
| SAMCCGM7_pC0878 | -           | X | transposase                                                |
| SAMCCGM7_pC0923 | -           | - | hypothetical protein                                       |
| SAMCCGM7_pC1059 | -           | - | hypothetical protein                                       |
| SAMCCGM7_pC1084 | -           | N | cellulose synthase catalytic subunit                       |
| SAMCCGM7_pC1137 | -           | R | carbon-nitrogen family hydrolase                           |
| SAMCCGM7_pC1140 | -           | I | transmembrane phospholipase protein                        |
| SAMCCGM7_pC1143 | -           | - | hypothetical protein                                       |
| SAMCCGM7_pC1232 | -           | Q | hypothetical protein                                       |
| SAMCCGM7_pC1266 | <i>lhgO</i> | G | L-2-hydroxyglutarate oxidase LhgO                          |
| SAMCCGM7_pC1297 | -           | M | glycosyl transferase family protein                        |
| SAMCCGM7_pC1298 | -           | M | mannosyl transferase                                       |
| SAMCCGM7_pC1308 | -           | D | CPSC/CAPB subfamily ATPase                                 |
| SAMCCGM7_pC1323 | -           | G | hypothetical protein                                       |
| SAMCCGM7_pC1324 | -           | U | HlyD family secretion protein                              |
| SAMCCGM7_pC1325 | -           | - | hypothetical protein                                       |
| SAMCCGM7_pC1327 | -           | M | hypothetical protein                                       |
| SAMCCGM7_pC1328 | -           | - | hypothetical protein                                       |
| SAMCCGM7_pC1329 | <i>pssL</i> | M | lipopolysaccharide biosynthesis protein wzxC               |
| SAMCCGM7_pC1330 | -           | G | glycosyl transferase family protein                        |
| SAMCCGM7_pC1331 | -           | G | glycosyl transferase family protein                        |
| SAMCCGM7_pC1332 | <i>hemL</i> | H | glutamate-1-semialdehyde 2,1-aminomutase                   |
| SAMCCGM7_pC1333 | -           | X | transposase for insertion sequence NGRIS-14b               |
| SAMCCGM7_pC1335 | -           | G | LmbE-like protein                                          |
| SAMCCGM7_pC1339 | -           | R | aminopeptidase                                             |
| SAMCCGM7_pC1340 | -           | M | NAD-dependent epimerase/dehydratase                        |
| SAMCCGM7_pC1363 | -           | - | hypothetical protein                                       |
| SAMCCGM7_pC1391 | -           | E | ABC transporter binding protein                            |
| SAMCCGM7_pC1481 | -           | - | hypothetical protein                                       |
| SAMCCGM7_pC1485 | -           | X | insertion sequence IS407                                   |
| SAMCCGM7_pC1548 | -           | R | threonine efflux protein                                   |
| SAMCCGM7_pC1575 | -           | - | hypothetical protein                                       |
| SAMCCGM7_pC1615 | -           | L | ATP-dependent DNA ligase YkoU                              |
| SAMCCGM7_pC1709 | -           | - | hypothetical protein                                       |
| SAMCCGM7_pC1853 | -           | K | AraC family transcriptional regulator                      |
| SAMCCGM7_pC1940 | -           | O | small heat shock protein                                   |
| SAMCCGM7_pC1945 | -           | S | arsenate reductase                                         |
| SAMCCGM7_pC1947 | -           | O | ABC-type transport, permease protein                       |
| SAMCCGM7_pC1951 | <i>fabG</i> | I | 3-oxoacyl-ACP reductase                                    |
| SAMCCGM7_pC1973 | -           | J | cytidine/deoxycytidylate deaminase family protein          |
| SAMCCGM7_pC2005 | -           | T | HipA protein                                               |
| SAMCCGM7_pC2006 | <i>spsA</i> | K | transcription regulator, symbiotic plasmid stability locus |
| SAMCCGM7_pC2008 | -           | E | alpha/beta hydrolase family protein                        |
| SAMCCGM7_pC2009 | -           | I | hypothetical protein                                       |
| SAMCCGM7_pC2012 | -           | R | transporter                                                |
| SAMCCGM7_pC2013 | -           | K | transcriptional regulator                                  |
| SAMCCGM7_pC2014 | -           | - | hypothetical protein                                       |
| SAMCCGM7_pC2015 | -           | O | cysteine protease                                          |
| SAMCCGM7_pC2045 | -           | X | ISSod11, transposase                                       |
| SAMCCGM7_pC2047 | -           | P | sulfatase                                                  |

|                 |             |   |                                                      |
|-----------------|-------------|---|------------------------------------------------------|
| SAMCCGM7_pC2051 | -           | G | sugar ABC transporter substrate-binding protein      |
| SAMCCGM7_pC2053 | -           | G | ABC transporter permease                             |
| SAMCCGM7_pC2055 | -           | I | glycerophosphoryl diester phosphodiesterase          |
| SAMCCGM7_pC2057 | -           | - | hypothetical protein                                 |
| SAMCCGM7_pC2060 | -           | R | myo-inositol 2-dehydrogenase 1                       |
| SAMCCGM7_pC2062 | -           | R | short-chain oxidoreductase                           |
| SAMCCGM7_pC2064 | -           | P | sulfur reduction protein DsrE                        |
| SAMCCGM7_pC2065 | -           | R | beta-lactamase domain-containing protein             |
| SAMCCGM7_pC2069 | -           | K | transcriptional regulator                            |
| SAMCCGM7_pC2073 | -           | X | ISSod11, transposase                                 |
| SAMCCGM7_pC2074 | <i>glcF</i> | C | glycolate dehydrogenase, iron-sulfur subunit GlcF    |
| SAMCCGM7_pC2082 | -           | C | flavoheмоprotein                                     |
| SAMCCGM7_pC2084 | -           | C | acetamidase                                          |
| SAMCCGM7_pC2085 | -           | K | helix-turn-helix-domain containing protein AraC type |
| SAMCCGM7_pC2086 | -           | Q | alkyl sulfatase                                      |
| SAMCCGM7_pC2092 | -           | X | transposase for insertion sequence element           |
| SAMCCGM7_pC2093 | -           | - | hypothetical protein                                 |
| SAMCCGM7_pC2094 | -           | R | alpha/beta hydrolase                                 |
| SAMCCGM7_pC2099 | -           | K | ArsR family transcriptional regulator                |
| SAMCCGM7_pC2102 | <i>ooxB</i> | E | opine oxidase subunit B                              |
| SAMCCGM7_pC2104 | <i>soxA</i> | I | sarcosine oxidase subunit alpha                      |
| SAMCCGM7_pC2106 | -           | - | hypothetical protein                                 |

---
