# Supplementary material for: Genomic studies of nitrogen-fixing rhizobial strains from Phaseolus vulgaris seeds and nodules
Source: PubMed Central journal article supplement (PMC5011921; doi:10.1186/s12864-016-3053-z), 2016-09-06
Supplement: 12864_2016_3053_MOESM3_ESM.pdf [file 12864_2016_3053_MOESM3_ESM.pdf]

**Supplementary Table 2. Average nucleotide identity (ANI<sub>m</sub>) among the genomes of selected *Sinorhizobium* and *Rhizobium* strains.**

*Sinorhizobium* strains

|         |   | 1           | 2           | 3           | 4           | 5           | Genome size, Mb |
|---------|---|-------------|-------------|-------------|-------------|-------------|-----------------|
| CCGM7   | 1 | -           | 98.3 (90.2) | 88.4 (69.2) | 88.7 (67.9) | 88.7 (67.0) | 6.9             |
| CFNEI73 | 2 | 98.3 (91.5) | -           | 88.4 (69.4) | 88.7 (67.8) | 88.7 (67.2) | 6.8             |
| USDA257 | 3 | 88.5 (61.3) | 88.4 (60.7) | -           | 89.8 (62.1) | 89.1 (60.4) | 7.6             |
| HH103   | 4 | 88.8 (58.6) | 88.8 (57.8) | 90.1 (61.3) | -           | 92.2 (64.0) | 7.8             |
| NGR234  | 5 | 88.7 (66.7) | 88.8 (66.4) | 89.8 (72.8) | 92.6 (78.9) | -           | 6.9             |

*Rhizobium* strains

|          |   | 1           | 2           | 3           | 4           |     |
|----------|---|-------------|-------------|-------------|-------------|-----|
| CCGM1    | 1 | -           | 97.1 (84.6) | 98.0 (89.6) | 90.5 (75.6) | 6.9 |
| CIAT652  | 2 | 97.1 (92.0) | -           | 97.3 (90.7) | 90.4 (77.0) | 6.4 |
| CNPAF512 | 3 | 98.0 (93.6) | 97.3 (86.9) | -           | 90.5 (76.1) | 6.7 |
| CFN42    | 4 | 90.5 (80.6) | 90.4 (75.6) | 90.5 (78.0) | -           | 6.5 |

Percentage of genome coverage in parenthesis.
