# Supplementary material for: Genomic studies of nitrogen-fixing rhizobial strains from Phaseolus vulgaris seeds and nodules
Source: PubMed Central journal article supplement (PMC5011921; doi:10.1186/s12864-016-3053-z), 2016-09-06
Supplement: 12864_2016_3053_MOESM4_ESM.pdf [file 12864_2016_3053_MOESM4_ESM.pdf]

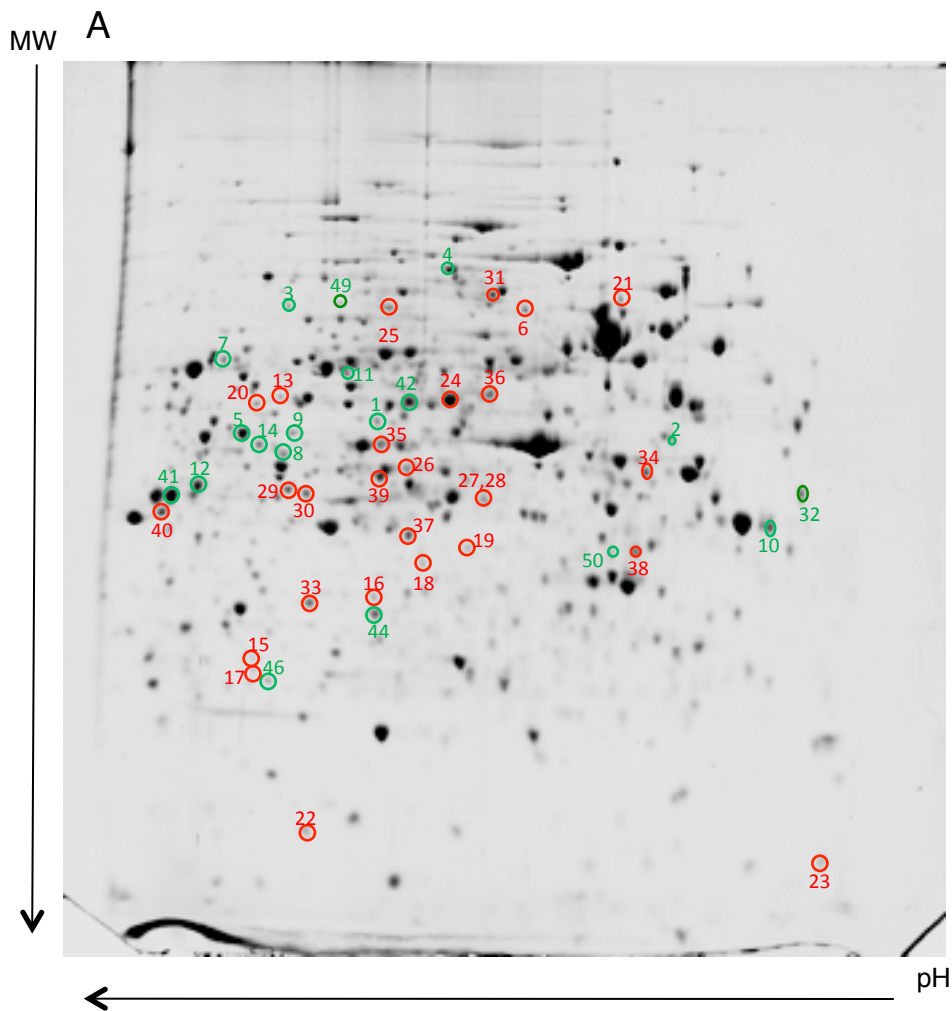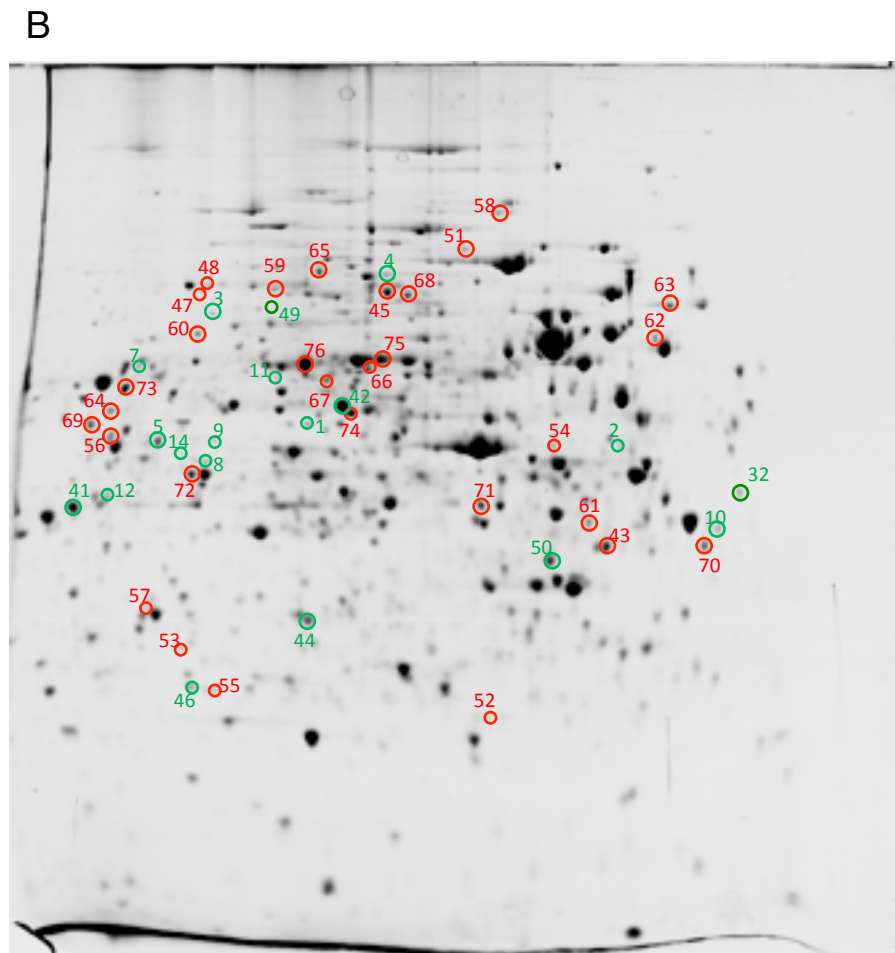

**Supplementary Fig. 2.** Proteomes of *R. phaseoli* strains. A, CCGM1. B, CIAT652. Spots taken for analysis are encircled, in red, abundant proteins in the strain which were not visible in the other; in green, abundant proteins in the strain with counterpart in the other. Lines with arrows denote the direction of the 2D runs.

C

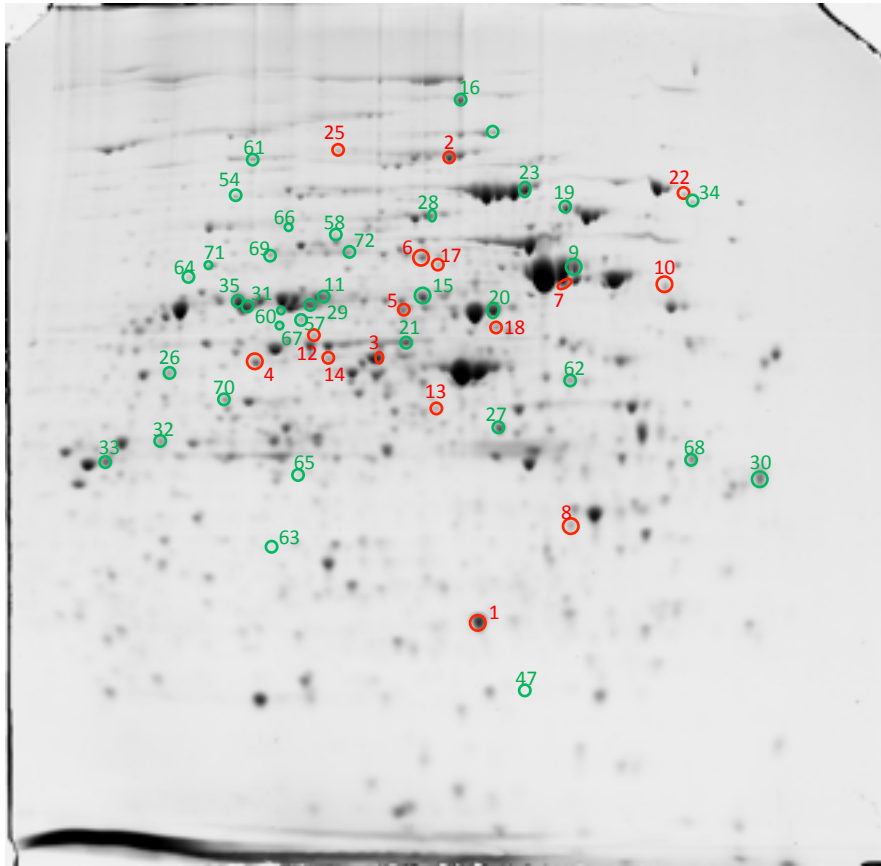

D

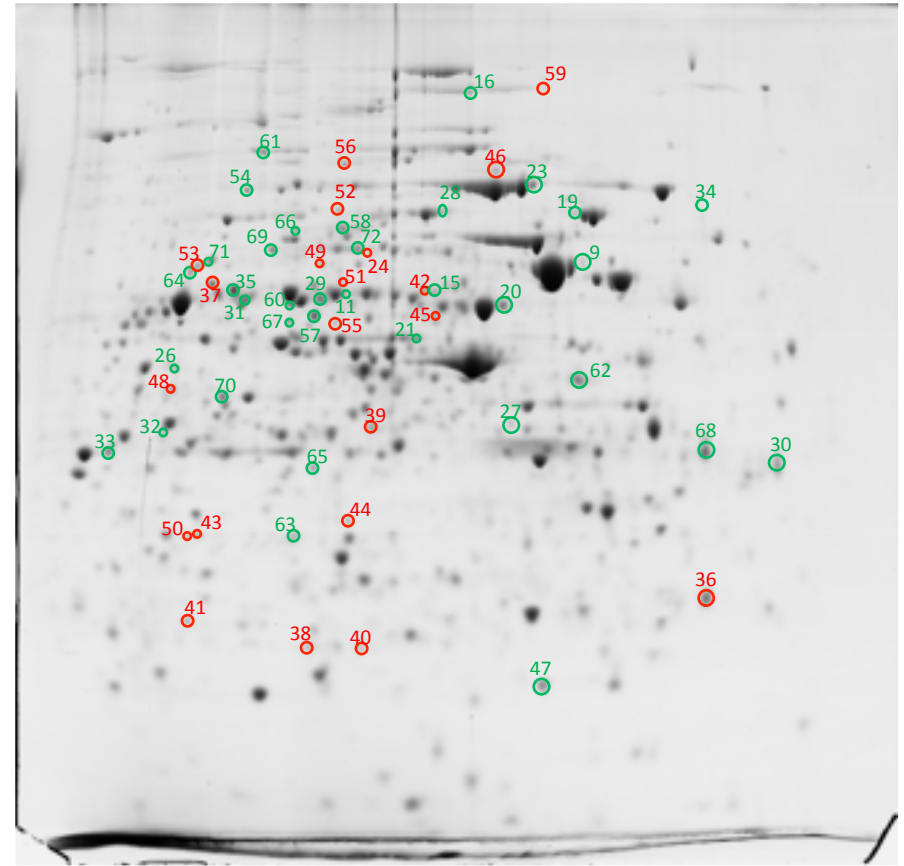

**Supplementary Fig. 2.** Proteomes of *S. americanum* strains. C, CCGM7. D, CFNEI73. Spots taken for analysis are encircled, in red, abundant proteins in the strain which were not visible in the other; in green, abundant proteins in the strain with counterpart in the other.
