# Supplementary material for: Genomic studies of nitrogen-fixing rhizobial strains from Phaseolus vulgaris seeds and nodules
Source: PubMed Central journal article supplement (PMC5011921; doi:10.1186/s12864-016-3053-z), 2016-09-06
Supplement: 12864_2016_3053_MOESM5_ESM.pdf [file 12864_2016_3053_MOESM5_ESM.pdf]

A

Cellular Overview of *Rhizobium etli* CIAT 652

Pan left/right/up/down the entire diagram by holding the left mouse button, click on an object for more info, right-click (ctrl-click for Mac) for menu

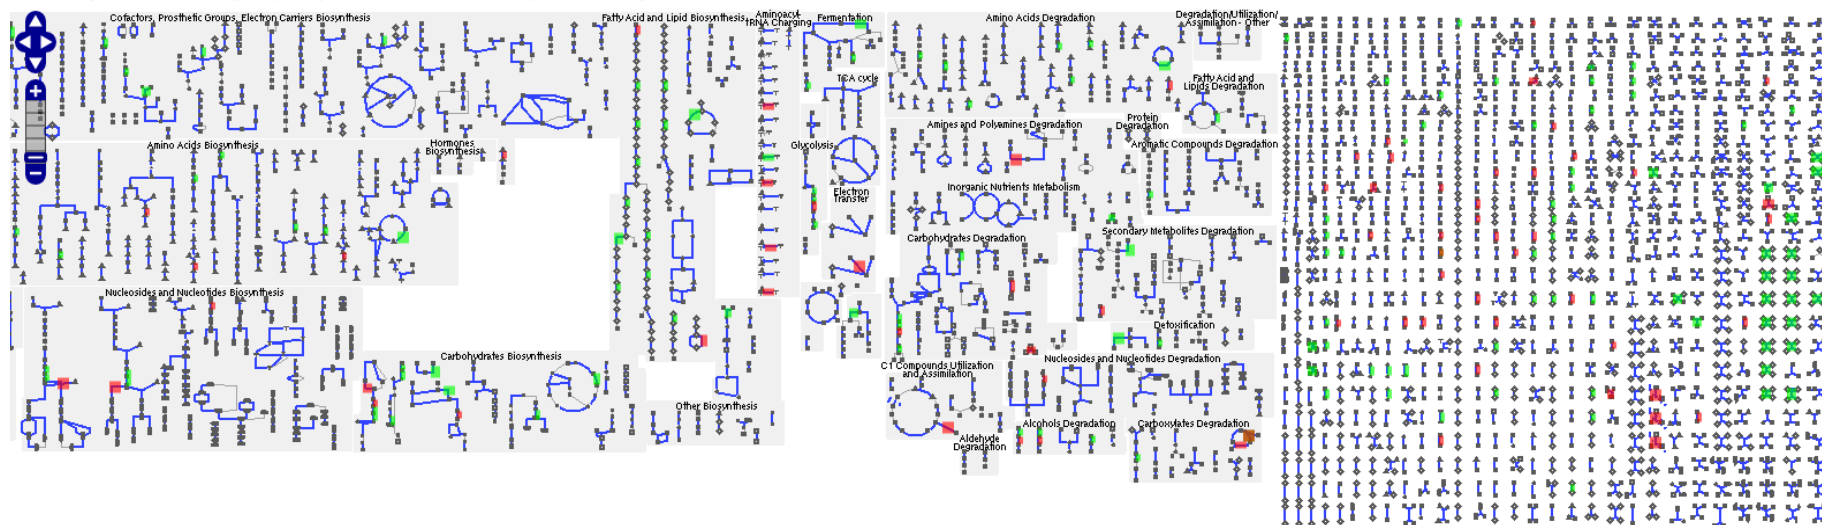*R. phaseoli* CCGM1.

| Spot no. | ID BIOCYC         | Spot no. | ID BIOCYC         |
|----------|-------------------|----------|-------------------|
| 24       | RHECIAT_CH0004168 | 17       | RHECIAT_CH0000394 |
| 41       | RHECIAT_CH0002030 | 18       | RHECIAT_CH0004208 |
| 8        | RHECIAT_PB0000381 | 35       | RHECIAT_CH0000144 |
| 5        | RHECIAT_CH0001858 | 1        | RHECIAT_CH0002368 |
| 7        | RHECIAT_CH0002358 | 15       | RHECIAT_CH0003904 |
| 14       | RHECIAT_PC0000303 | 13       | RHECIAT_CH0003000 |
| 25       | RHECIAT_CH0002930 | 33       | RHECIAT_CH0003815 |
| 29       | RHECIAT_CH0000591 | 10       | RHECIAT_CH0000747 |
| 6        | RHECIAT_CH0001854 | 21       | RHECIAT_PC0000604 |
| 11       | RHECIAT_CH0004399 | 22       | RHECIAT_CH0002166 |
| 2        | RHECIAT_CH0003742 | 31       | RHECIAT_PC0000231 |
| 9        | RHECIAT_CH0003793 | 4        | RHECIAT_PC0000007 |
| 34       | RHECIAT_CH0003050 | 16       | RHECIAT_CH0001861 |
| 38       | RHECIAT_CH0000536 | 27       | RHECIAT_CH0003212 |
| 40       | RHECIAT_CH0003737 | 28       | RHECIAT_CH0000308 |
| 3        | RHECIAT_CH0001005 | 30       | RHECIAT_CH0003391 |
| 23       | RHECIAT_CH0000005 | 19       | RHECIAT_CH0000822 |
| 26       | RHECIAT_CH0001030 | 37       | RHECIAT_CH0003384 |
| 36       | RHECIAT_CH0000032 | 12       | RHECIAT_PB0000125 |
| 39       | RHECIAT_CH0003694 | 20       | RHECIAT_CH0000250 |
|          |                   | 32       | RHECIAT_PC0000655 |

*R. phaseoli* CIAT652.

| Spot no. | ID BIOCYC         | Spot no. | ID BIOCYC         |
|----------|-------------------|----------|-------------------|
| 47       | RHECIAT_PC0000173 | 59       | RHECIAT_CH0002285 |
| 62       | RHECIAT_CH0002031 | 65       | RHECIAT_CH0000980 |
| 67       | RHECIAT_CH0004343 | 66       | RHECIAT_CH0002242 |
| 69       | RHECIAT_CH0001680 | 57       | RHECIAT_CH0001733 |
| 75       | RHECIAT_CH0000039 | 74       | RHECIAT_CH0003488 |
| 76       | RHECIAT_CH0002032 | 46       | RHECIAT_CH0001879 |
| 49       | RHECIAT_PC0000423 | 52       | RHECIAT_CH0001895 |
| 50       | RHECIAT_CH0003659 | 63       | RHECIAT_CH0002260 |
| 60       | RHECIAT_CH0002150 | 70       | RHECIAT_CH0004147 |
| 72       | RHECIAT_CH0001992 | 71       | RHECIAT_CH0002820 |
| 73       | RHECIAT_CH0000879 | 56       | RHECIAT_PC0000681 |
| 51       | RHECIAT_CH0003979 | 43       | RHECIAT_CH0004212 |
| 55       | RHECIAT_CH0000213 | 44       | RHECIAT_CH0004405 |
| 61       | RHECIAT_CH0003393 | 68       | RHECIAT_CH0002473 |
| 64       | RHECIAT_CH0003248 | 45       | RHECIAT_CH0004199 |
| 42       | RHECIAT_CH0001955 |          |                   |
| 53       | RHECIAT_CH0003282 |          |                   |
| 48       | RHECIAT_PA0000110 |          |                   |
| 54       | RHECIAT_CH0004024 |          |                   |
| 58       | RHECIAT_CH0001897 |          |                   |

**B**

Cellular Overview of *Sinorhizobium meliloti* 1021

Pan left/right/up/down the entire diagram by holding the left mouse button, click on an object for more info, right-click (ctrl-click for Mac) for menu

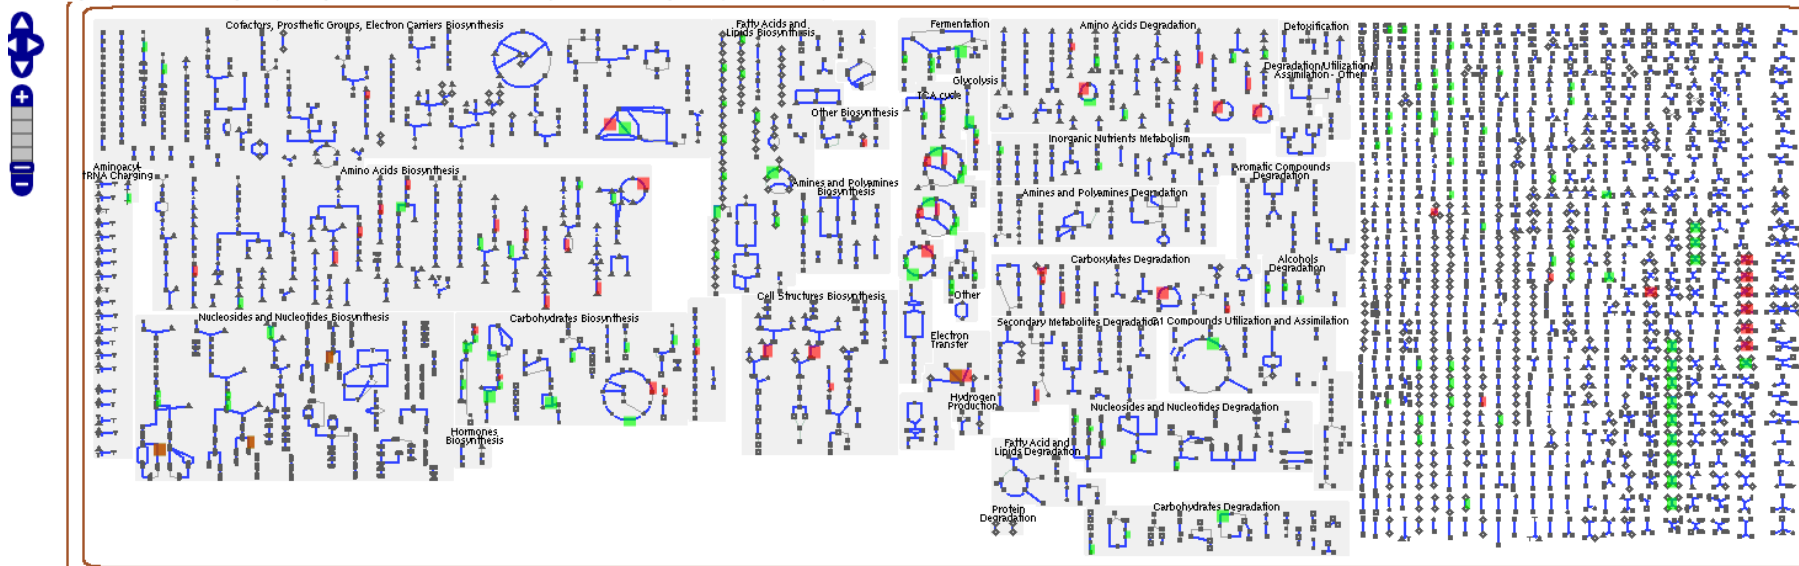

*S. americanum* CCGM7.

| Spot no. | ID BIOCYC | Spot no. | ID BIOCYC |
|----------|-----------|----------|-----------|
| 2        | SMc03846  | 21       | SMc02755  |
| 3        | SMc02483  | 14       | SMc00574  |
| 4        | SMc00149  | 1        | SMc02692  |
| 8        | SM_b20025 | 7        | SMc01350  |
| 11       | SMc02562  | 23       | SMc00324  |
| 12       | SM_b20891 | 9        | SMc00913  |
| 20       | SMc02501  | 25       | SMc02433  |
| 28       | SMc01920  | 5        | SMc00090  |
| 29       | SMc02689  | 13       | SM_b21432 |
| 31       | SMc02499  | 22       | SMc01657  |
| 16       | SMc01215  | 27       | SM_b21432 |
| 17       | SMc02717  | 34       | SMc01657  |
| 18       | -         | 6        | SMc04454  |
| 26       | SMc01770  | 10       | SMA1303   |
| 19       | SMc04018  | 15       | -         |
| 35       | SMc04088  |          |           |
| 24       | SMc03925  |          |           |
| 30       | SM_b20895 |          |           |
| 32       | SMc03983  |          |           |
| 33       | SMc03979  |          |           |

*S. americanum* CFNEI73.

| Spot no. | ID BIOCYC | Spot no. | ID BIOCYC |
|----------|-----------|----------|-----------|
| 37       | SMc02487  | 58       | SM_b20615 |
| 44       | SMA1927   | 64       | SMc02599  |
| 47       | SMc00869  | 48       | SM_b21181 |
| 53       | SMc02377  | 46       | SMc01312  |
| 54       | SMc02581  | 42       | SMc00100  |
| 57       | SMc00781  | 39       | -         |
| 70       | SMc01915  | 50       | SMc01027  |
| 72       | SMc02465  | 67       | SMc01861  |
| 36       | SMc03131  | 40       | SMc02083  |
| 43       | SMc01801  | 61       | SMc01905  |
| 49       | SM_b21163 | 68       | SMc02146  |
| 51       | SMc04455  | 45       | SMc02978  |
| 52       | SMc02580  | 55       | SMc04383  |
| 59       | SMc03112  | 38       | SMc00168  |
| 63       | SMc01732  | 60       | SMc01043  |
| 65       | SMc04325  | 56       | SMA1315   |
| 69       | SMc02832  | 41       | SM_b20964 |
| 71       | SMc00951  |          |           |
| 62       | SMc03981  |          |           |
| 66       | SMc03926  |          |           |

**Supplementary Fig. 3.** Metabolic reconstruction with BioCyc using the most abundant proteins of the strains detected in the proteome. A, *Rhizobium phaseoli* strains. Enzymes participating in metabolic pathways. Green boxes, the most abundant proteins from CCGM1 strain. Red boxes, the most abundant proteins from CIAT652 strain. B, *Sinorhizobium americanum* strains. Enzymes participating in metabolic pathways. Green boxes, the most abundant proteins from CCGM7 strain. Red boxes, the most abundant proteins from CFNEI73 strain. Brown were both coincided. The lists of proteins enable their use directly on the BioCyc page with the denoted organism. (-) denotes that no homolog was found in the strain.
